1 **Patterns of gene content and co-occurrence constrain the evolutionary path toward**  
2 **animal association in CPR bacteria**

3  
4 Alexander L. Jaffe<sup>1</sup>, Christine He<sup>2</sup>, Ray Keren<sup>3</sup>, Luis E. Valentin-Alvarado<sup>1,2</sup>, Patrick Munk<sup>4</sup>, Keith  
5 Bouma-Gregson<sup>5,6</sup>, Yuki Amano<sup>7,8</sup>, Patrick T. West<sup>9</sup> and Jillian F. Banfield<sup>\*2,5,10,11</sup>

6  
7 <sup>1</sup>Department of Plant and Microbial Biology, University of California, Berkeley, CA

8 <sup>2</sup>Innovative Genomics Institute, University of California, Berkeley, CA

9 <sup>3</sup>Department of Civil and Environmental Engineering, University of California, Berkeley, CA

10 <sup>4</sup>National Food Institute, Technical University of Denmark, Kongens Lyngby, Denmark

11 <sup>5</sup>Department of Earth and Planetary Science, University of California, Berkeley, CA

12 <sup>6</sup>Department of Integrative Biology, University of California, Berkeley, CA

13 <sup>7</sup>Nuclear Fuel Cycle Engineering Laboratories, Japan Atomic Energy Agency

14 <sup>8</sup>Horonobe Underground Research Center, Japan Atomic Energy Agency

15 <sup>9</sup>Department of Medicine (Hematology & Blood and Marrow Transplantation), Stanford University, Stanford, CA

16 <sup>10</sup>Department of Environmental Science, Policy, and Management, University of California, Berkeley, CA

17 <sup>11</sup>Chan Zuckerberg Biohub, San Francisco, CA

18 \*Corresponding author email: [jbanfield@berkeley.edu](mailto:jbanfield@berkeley.edu)

19  
20  
21  
22  
23  
24  
25  
26  
27  
28  
29  
30  
31  
32  
33  
34  
35  
36  
37  
38  
39  
40  
41  
42  
43  
44  
45  
46

1 **ABSTRACT:** Bacteria from the Candidate Phyla Radiation (CPR) are small, likely episymbiotic  
2 organisms found across Earth's ecosystems. Despite their prevalence, the distribution of CPR  
3 lineages across habitats and the genomic signatures of transitions amongst these habitats  
4 remain unclear. Here, we expand the genome inventory for Absconditabacteria (SR1),  
5 Gracilibacteria, and Saccharibacteria (TM7), CPR bacteria known to occur in both  
6 animal-associated and environmental microbiomes, and investigate variation in gene content  
7 with habitat of origin. By combining phylogeny and habitat information, we show that bacteria  
8 from these three lineages have undergone multiple transitions from environmental habitats into  
9 animal microbiomes. Using computational co-occurrence analyses based on hundreds of  
10 metagenomes, we extend the prior suggestion that certain Saccharibacteria have broad  
11 bacterial host ranges and constrain possible host relationships for Absconditabacteria and  
12 Gracilibacteria. Full-proteome analyses show that Saccharibacteria from animal-associated  
13 microbiomes have, on average, smaller gene repertoires than their environmental counterparts  
14 and are enriched in numerous protein families, including those likely functioning in amino acid  
15 metabolism, phage defense, and detoxification of peroxide. In contrast, some freshwater  
16 Saccharibacteria encode a putative bacteriorhodopsin. For protein families that exhibited the  
17 clearest patterns of differential habitat distribution, we compared protein and species  
18 phylogenies to estimate the incidence of lateral gene transfer and genomic loss that occurred  
19 over the species tree. These analyses suggest that habitat transitions were likely not  
20 accompanied by large transfer or loss events, but rather were associated with continuous  
21 proteome remodeling. Thus, we speculate that CPR habitat transitions were driven largely by  
22 availability of suitable host taxa, and were reinforced by acquisition and loss of some capacities.

23

24 **IMPORTANCE:** Studying the genetic differences between related microorganisms from different  
25 environment types can indicate factors associated with their movement among habitats. This is  
26 particularly interesting for bacteria from the Candidate Phyla Radiation because their minimal  
27 metabolic capabilities require symbiotic associations with microbial hosts. We found that shifts  
28 of Absconditabacteria, Gracilibacteria, and Saccharibacteria between environmental  
29 ecosystems and mammalian mouths/guts probably did not rely upon major episodes of gene  
30 gain and loss; rather, gradual genomic change followed habitat migration. The results inform our  
31 understanding of how little known microorganisms establish in the human microbiota where they  
32 may ultimately impact our health.

33

34 **Keywords:** Candidate Phyla Radiation; habitat transition, animal microbiomes; comparative  
35 genomics; bacterial evolution

36

37

38

39

40

41

42

43

## 1 INTRODUCTION:

2 The Candidate Phyla Radiation (CPR) is a phylogenetically diverse clade of bacteria  
3 characterized by reduced metabolisms, potentially episymbiotic lifestyles, and ultrasmall cells.  
4 While the first high-quality CPR genomes were primarily from groundwater, sediment, and  
5 wastewater (1–3), subsequently genomes have been recovered from diverse environmental and  
6 animal-associated habitats, including humans. Intriguingly, from dozens of major CPR lineages,  
7 only three - Candidatus Absconditabacteria (formerly SR1), Gracilibacteria (formerly BD1-5 and  
8 GN02), and Saccharibacteria (formerly TM7) - are consistently associated with animal oral  
9 cavities and digestive tracts (4). The Saccharibacteria are perhaps the most deeply studied of  
10 all CPR lineages to date, likely due to their widespread presence in human oral microbiomes  
11 and association with disease states such as gingivitis and periodontitis (5, 6). On the other  
12 hand, Absconditabacteria and Gracilibacteria remain deeply undersampled, potentially due to  
13 their rarity in microbial communities or their use of an alternative genetic code that may  
14 confound some gene content analyses (1, 7, 8).

15 Absconditabacteria, Gracilibacteria, and Saccharibacteria are predicted to be obligate  
16 fermenters, dependent on other microorganisms (hosts) for components such as lipids, nucleic  
17 acids, and many amino acids (1, 3). Despite a generally reduced metabolic platform, CPR  
18 bacteria display substantial variation in their genetic capacities, even within lineages (9, 10). For  
19 example, some Gracilibacteria lack essentially all genes of the glycolysis and  
20 pentose-phosphate pathways and the TCA cycle (11). In contrast to many CPR, soil-associated  
21 Saccharibacteria encode numerous genes related to oxygen metabolism (12, 13). Pangenome  
22 analyses have shown genetic evidence for niche partitioning among Saccharibacteria from the  
23 same body site (14). However, the lack of comprehensive genomic sampling of these three CPR  
24 lineages across habitats, particularly from environmental biomes, has left unclear the full extent  
25 to which CPR gene inventories vary with habitat type, and, relatedly, the extent to which  
26 changes in metabolic capacities might have been reshaped during periods of environmental  
27 transition. Of particular interest is whether rapid gene acquisitions (e.g., via lateral gene  
28 transfer) or losses enabled habitat switches, or if these changes occurred gradually following  
29 habitat change.

30 The availability of suitable hosts may also drive the colonization of new environments by CPR  
31 bacteria (14). While there has been significant progress in characterizing the relationship

1 between Saccharibacteria and Actinobacteria in the oral habitat (15–17), other CPR-host  
2 relationships remain unclear. Elucidation of environmental transitions among CPR lineages will  
3 require both thorough analysis of metabolic repertoires as well as a better understanding of  
4 associations with other microorganisms. Here, we augment existing sampling of CPR genomes  
5 and their surrounding communities to examine patterns of distribution, abundance, and gene  
6 content in different microbiome types. We also make use of whole-community co-occurrence  
7 patterns to shed light on the potential host range of the CPR bacteria in the studied ecosystems.  
8 In combination, our analyses shed light on the frequency of habitat shifts in three CPR lineages  
9 and the evolutionary processes likely underlying them.

10

## 11 **RESULTS:**

### 12 *Environmental diversity, phylogenetic relationships, and abundance patterns*

13 We gathered an environmentally comprehensive set of Absconditabacteria, Gracilibacteria, and  
14 Saccharibacteria by querying multiple databases for genomes assembled in previous studies  
15 and assembling new genomes from several additional metagenomic data sources (Table S1,  
16 Materials and Methods) (1–4, 7, 12–15, 18–82). Quality filtration of this curated genome set at  $\geq$   
17 70% completeness and  $\leq$  10% contamination and subsequent de-replication at 99% average  
18 nucleotide identity (ANI) yielded a non-redundant set of 389 genomes for downstream analysis  
19 (Table S1). Absconditabacteria and Gracilibacteria were less frequently sampled relative to  
20 Saccharibacteria, comprising only  $\sim$ 7.5% and  $\sim$ 10.8% of the total genome set, respectively. All  
21 three lineages were distributed across a broad range of microbiomes, encompassing various  
22 environmental habitats (freshwater, marine, soil, engineered, plant-associated, hypersaline) as  
23 well as multiple animal-associated microbiomes (oral and gut) (Fig. 1). Unlike animal-associated  
24 Gracilibacteria and Absconditabacteria genomes, which were recovered only from human and  
25 animal oral samples, animal-associated Saccharibacteria were found in samples from both oral  
26 and gut compartments.

27 We extracted 16 syntenic, phylogenetically informative ribosomal proteins from each genome to  
28 construct a CPR species tree and evaluate how habitat of origin maps onto phylogeny.

29 Sequences from related CPR bacteria were used as outgroups for tree construction (Materials  
30 and Methods). The resolved topology supports monophyly of all three lineages and a sibling

1 relationship between the two alternatively coded lineages, Absconditabacteria and  
2 Gracilibacteria (Figure 1a, File S1), consistent with previous findings for the CPR (10). For the  
3 Absconditabacteria, a single clade of organisms derived from animal-associated microbiomes  
4 was deeply nested within genomes from the environment. On the other hand, Gracilibacteria  
5 clearly formed two major lineages (GRA 1-2), each with a small subclade comprised of  
6 animal-associated genomes. For Saccharibacteria, deeply-rooting lineages were also almost  
7 exclusively of environmental origin (soil, water, sediment) and animal-associated genomes were  
8 strongly clustered into at least three independent subclades (Fig. 1a). Two of these three  
9 subclades were exclusively composed of animal-associated sequences whereas one (SAC 5),  
10 was a mixture of animal-associated, wastewater (potentially of human origin) and a few aquatic  
11 sequences. Intriguingly, for both Saccharibacteria and Gracilibacteria, a subset of organisms  
12 from the dolphin mouth (22) did not affiliate with those from terrestrial mammals/humans and  
13 instead fell within marine/environmental clades (indicated by asterisks in Fig. 1). In primarily  
14 environmental clades (SAC 1 and 4), genomes from soil, freshwater, engineered, and halophilic  
15 environments were phylogenetically interspersed, suggesting comparatively wide global  
16 distributions for these lineages. One exception to this pattern were two clades representing  
17 distinct hypersaline environments - a hypersaline lake and salt crust (65, 70).

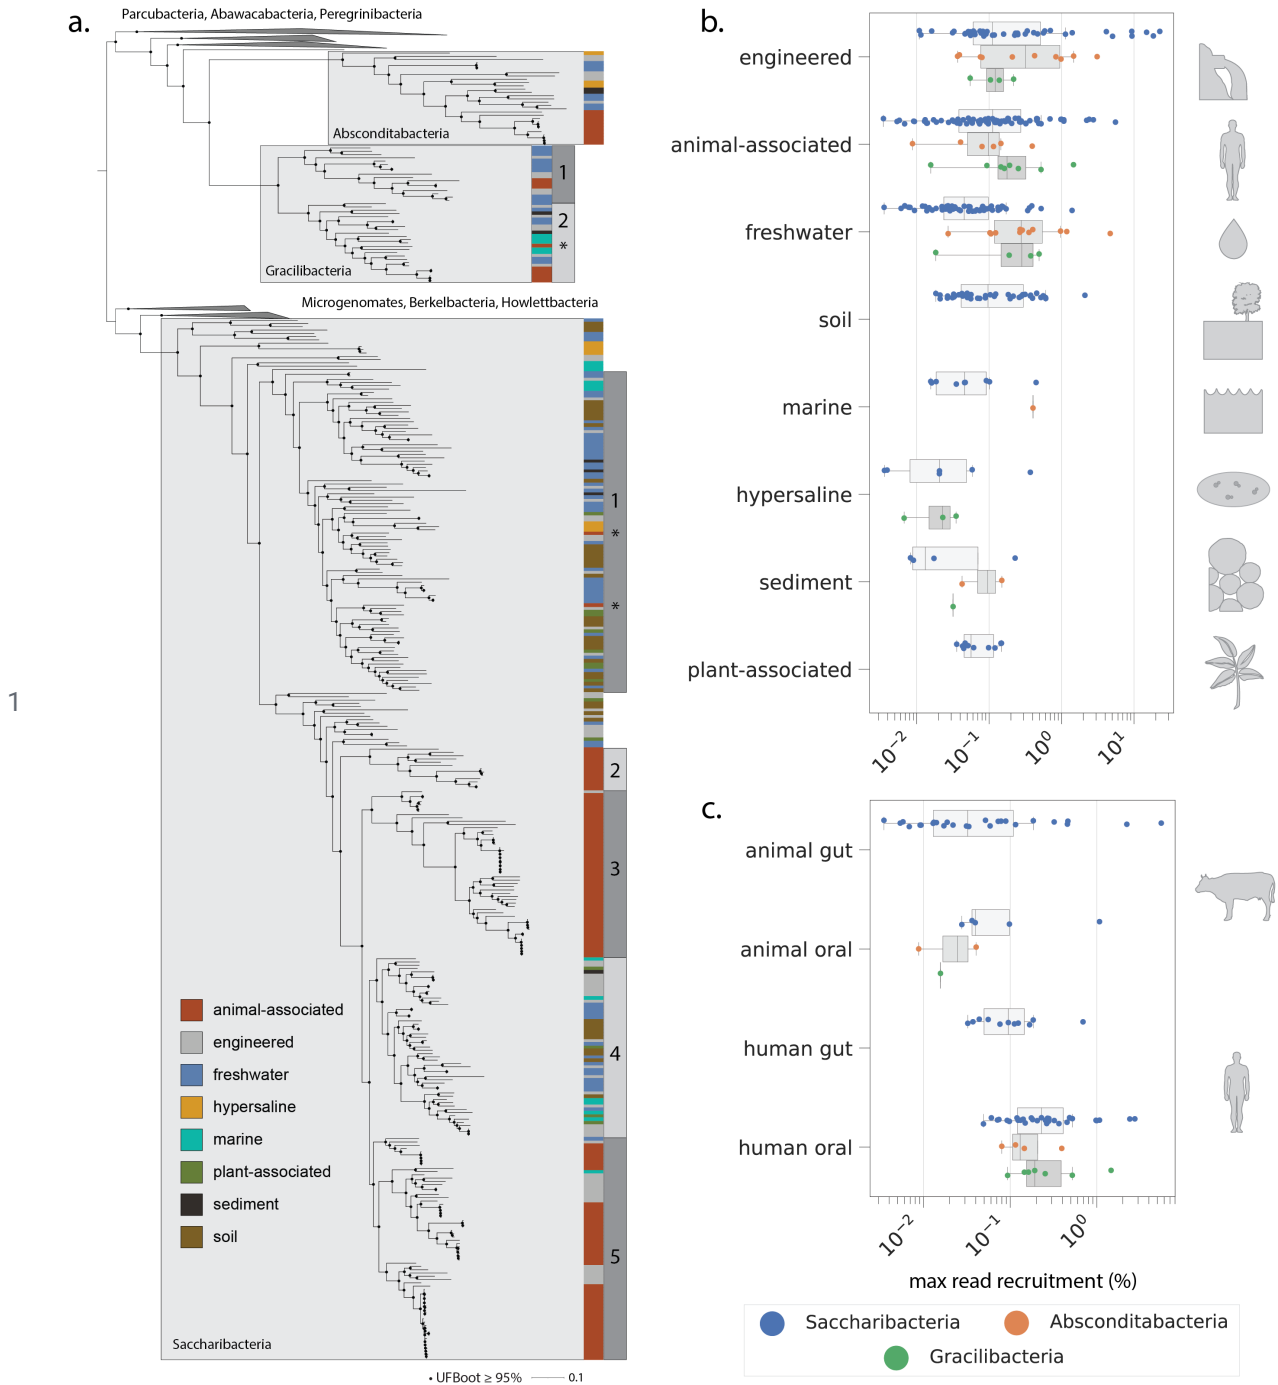

**Fig. 1.** Phylogenetic and environmental patterns for the Absconditabacteria, Gracilibacteria, and Saccharibacteria. **a)** Maximum-likelihood tree based on 16 concatenated ribosomal proteins (1976 amino acids, LG+R10 model). Scale bar represents the average number of substitutions per site. Asterisks indicate phylogenetic position of a subset of organisms derived from dolphin mouth metagenomes. Percentage of reads per metagenomic sample mapping to individual genomes across **b)** environments and **c)** body sites of humans and animals.

1 We used read mapping to assess the abundance of Absconditabacteria, Gracilibacteria, and  
2 Saccharibacteria genomes in the samples from which they were originally reconstructed.  
3 Generally, these CPR bacteria are not dominant members of microbial communities (<1% of  
4 reads). However, they were relatively abundant in some engineered, animal-associated, and  
5 freshwater environments (Fig. 1b). In rare cases, CPR taxa comprised >10% of reads (Fig. 1b),  
6 and in a bioreactor (engineered) reached a maximum of ~22% of reads. Gracilibacteria and  
7 Absconditabacteria attained comparable read recruitment to Saccharibacteria and were  
8 particularly abundant in some groundwater and animal-associated habitats. In contrast to  
9 Saccharibacteria, Gracilibacteria and Absconditabacteria have so far only been minimally  
10 detected in soil and plant-associated microbiomes. We also compared abundance patterns  
11 across animal body sites. As expected based on extensive prior work (5, 16, 44),  
12 Saccharibacteria exhibited highest read recruitment in the human oral microbiome. However,  
13 these bacteria can also comprise a significant fraction of the microbial community in exceptional  
14 gut/oral microbiomes from cows, pigs, and dolphins (Fig. 1c), in one case approaching 5% of  
15 sequenced reads (Table S2). Saccharibacteria are rarely detected in the human gut (<0.1% of  
16 reads), despite extensive sequencing of this body site.

17

18

### 19 *Patterns of co-occurrence constrain CPR host range across environments*

20 Despite recent progress made in experimentally identifying bacterial host range for oral  
21 Saccharibacteria, little is known about associations in other habitats. Abundance pattern  
22 correlations can be informative regarding associations involving obligate symbionts and their  
23 microbial hosts (37, 55); however, such analyses often rely on highly resolved time-series for  
24 statistical confidence. Here, we instead examine patterns of co-occurrence within samples to  
25 probe potential relationships between CPR bacteria and their microbial hosts. Given recent  
26 experimental evidence demonstrating the association of multiple Saccharibacteria strains with  
27 various Actinobacteria in the human oral microbiome (15–17, 44, 83), we predicted that  
28 Actinobacteria may be common hosts of Saccharibacteria in microbiomes other than the mouth  
29 and asked to what extent co-occurrence data supported this relationship.

30 We first identified all ribosomal protein S3 (rps3) sequences from Actinobacteria and  
31 Saccharibacteria in the source metagenomes probed above for relative abundance patterns.  
32 Rps3 sequences from all samples were clustered into ‘species groups’ (Materials and Methods).

1 We observed that species groups from Actinobacteria and Saccharibacteria frequently  
2 co-occurred in the soil and plant-associated microbiomes as well as several hypersaline  
3 microbiomes (Fig. 2a). On the other hand, co-occurrence of the two lineages was less frequent  
4 in engineered and freshwater environments relative to other environments. Surprisingly, only  
5 ~78% of animal-associated samples containing Saccharibacteria also contained Actinobacteria  
6 at abundances high enough to be detected (Fig. 2a). Assemblies with well-sampled  
7 Saccharibacteria yet no detectible Actinobacteria could suggest that Saccharibacteria have  
8 alternative hosts in these samples or are able to (at least periodically) live independently.

9 For samples where both Saccharibacteria and Actinobacteria marker genes were detectable,  
10 we computed a 'relative richness' metric describing the ratio of distinct Saccharibacteria species  
11 groups to Actinobacteria species groups. In most animal-associated microbiomes,  
12 Actinobacteria were more species rich (lower richness ratios), as expected if individual  
13 Saccharibacteria can associate with multiple hosts (Fig. 2a). Greater species richness of  
14 Actinobacteria compared to Saccharibacteria was also observed for many plant-associated, soil,  
15 engineered, and freshwater microbiomes. However, some engineered freshwater samples had  
16 richness ratios equal to (equal richness) or greater than 1 (i.e., Saccharibacteria more species  
17 rich) (Fig. 2a). Specifically, we observed that several metagenomes from engineered and  
18 freshwater environments contained anywhere from 1-11 Saccharibacteria species but only one  
19 detectable Actinobacteria species (Table S4). Thus, if Actinobacteria serve as hosts for  
20 Saccharibacteria in these habitats, there may be both exclusive associations and associations  
21 linking multiple Saccharibacteria species with a single Actinobacteria host species.

22 We next tested for more specific possible associations in the animal microbiome, reasoning that  
23 if Actinobacteria are common hosts for Saccharibacteria, then exclusive co-occurrence of a  
24 particular Saccharibacteria species with singular Actinobacteria species within a sample might  
25 be suggestive of *in vivo* interactions. We mapped all pairs of Saccharibacteria and  
26 Actinobacteria species that co-occurred within a single sample onto the trees constructed from  
27 the rpS3 sequences (Fig. 2b), including 22 Saccharibacteria-Actinobacteria pairs reported in  
28 previous experimental studies (Table S3). In three additional cases, we found that individual  
29 metagenomic samples contained only one assembled Saccharibacteria species group and one  
30 Actinobacteria species group ("exclusive co-occurrence - species group", Fig. 2b). Two of these  
31 cases involved Actinobacteria from the order Actinomycetales, where multiple Saccharibacteria  
32 hosts have already been identified. We also noted exclusive species-level co-occurrence of a



1 Saccharibacteria species group from the human gut and an Actinobacteria species group from  
2 the order Coriobacterales (Table S4). In an additional seven cases, one Saccharibacteria  
3 species group occurred with multiple Actinobacteria species groups of the same order-level  
4 classification based on rps3 gene profiling (“exclusive co-occurrence - order”, Fig. 2b). Five of  
5 the seven instances involved pairs of Saccharibacteria and Coriobacterales from termite and  
6 swine gut metagenomes. Thus, unlike in oral environments, Coriobacterales may serve as hosts  
7 for Saccharibacteria in gut environments of multiple animal species. More generally, we also  
8 observed that Saccharibacteria in the same phylogenetic clade had predicted relationships to  
9 Actinobacteria that were phylogenetically unrelated (Fig. 2b), consistent with previous  
10 experimental observations for individual species (44).

11 Compared to Saccharibacteria, host relationships for Gracilibacteria and Absconditabacteria  
12 have received little attention. There are preliminary indications that Absconditabacteria may  
13 associate with members of the Fusobacteria or Firmicutes in the oral microbiome (44) or the  
14 gammaproteobacterium *Halochromatium* in certain salt lakes (84). We thus explored  
15 co-occurrence patterns in microbial communities containing Absconditabacteria and  
16 Gracilibacteria, attempting to further constrain possible host taxa. In animal and  
17 human-associated microbiomes, bacteria from several lineages, including Fusobacteria (Fig.  
18 2c), were relatively abundant in nearly all samples that contained Absconditabacteria. Members  
19 of the Chitinophagales, Pseudomonadales, and Acidimicrobiales were detected in high  
20 abundance in three wastewater samples from similar treatment plants (40) and one dairy pond  
21 sample containing Absconditabacteria. No clear patterns of co-occurrence were observed for  
22 Gracilibacteria, with the potential exception of Campylobacteriales, which co-occurred in 8 of 10  
23 groundwater samples where Gracilibacteria were found (Fig. 2c). Across all environments, only  
24 members of the order Burkholderiales (a large order of Gammaproteobacteria) consistently  
25 co-occurred with Gracilibacteria.

26

27

28

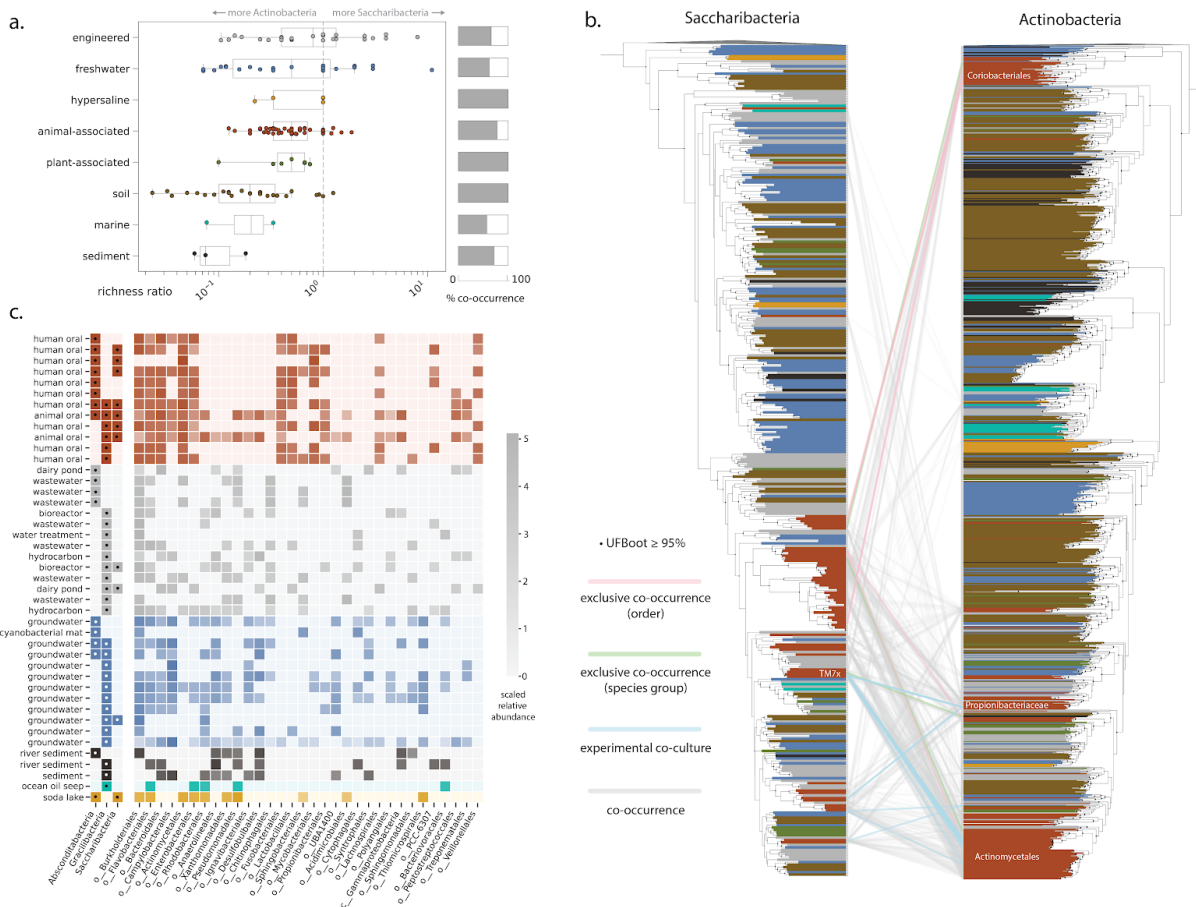

2 **Fig. 2.** Patterns of co-occurrence between CPR and potential host lineages across environments. **a)**  
 3 Relative richness ratio, describing the ratio of distinct Saccharibacteria species groups to Actinobacteria  
 4 species groups, for each sample and overall co-occurrence percentage across habitat categories. **b)**  
 5 Maximum-likelihood trees for Saccharibacteria and Actinobacteria based on ribosomal protein S3  
 6 sequences extracted from all source metagenomes. Co-occurrence patterns are shown only for species  
 7 groups derived from animal-associated metagenomes. **c)** Community composition for metagenomic  
 8 samples containing Absconditabacteria and Gracilibacteria. Cells with dots indicate only presence,  
 9 whereas those without dots convey quantitative relative abundance information. Only potential host  
 10 lineages present in 8 or more samples are shown.

11

12 Among the least complex communities that contained Absconditabacteria were cyanobacterial  
 13 mats from a California river network, where dominant cyanobacterial taxa accounted for  
 14 ~60-98% relative abundance (32). To complement the above co-occurrence analyses, we  
 15 re-analyzed 22 metagenomes representing spatially separated mats and discovered that  
 16 Absconditabacteria were detectable in 12 of them at varying degrees of coverage (0.12-37x). As  
 17 noted previously, also present in the mats were members of the phyla Bacteroidetes,  
 18 Betaproteobacteria, and Verrucomicrobia (32). Correlation of read coverage profiles across  
 19 mats provided moderate support for the association of Absconditabacteria and Bacteroidetes.

1 Specifically, many of the strongest species-level correlations, including five of the top ten,  
2 involved Bacteroidetes (Table S5).

3

4

5 *Gene content of Absconditabacteria, Gracilibacteria, and Saccharibacteria*

6

7 We next examined how gene content of the three selected CPR lineages varied across  
8 environments. We first compared proteome size of these bacteria across habitats, taking into  
9 consideration differing degrees of genome completeness. This analysis revealed that genomes  
10 from soil and the rhizosphere (plant-associated) have on average larger proteomes relative to  
11 those from animal-associated environments (Fig. 3b). Saccharibacteria from hypersaline  
12 environments appear to have the smallest proteomes, although the limited number of  
13 high-quality genomes in this category currently limits a firm conclusion. We observed some  
14 evidence for variance in proteome size among Absconditabacteria and Gracilibacteria, including  
15 potentially smaller proteome sizes among animal-associated Gracilibacteria (Fig. S1). However,  
16 additional high quality genomes will be required to confirm this trend.

17

18 To examine overall proteome similarity as a function of habitat type, we employed a recently  
19 developed protein-clustering approach that is agnostic to functional annotation (9) (Table S6,  
20 Materials and Methods). Among Saccharibacteria, principal coordinates analysis (PCoA) of  
21 presence/absence profiles for all protein families with 5 or more members yielded a primary axis  
22 of variation (~12% variance explained) that distinguished animal-associated Saccharibacteria  
23 from environmental or plant-associated ones and a secondary axis (~8 % variance explained)  
24 that distinguished between phylogenetic clades (SAC1-3 vs 4-5). We did not observe strong  
25 clustering of Saccharibacteria by specific environmental biome, consistent with the interspersed  
26 nature of their phylogenetic relationships (Fig. 1a, 3b). Intriguingly, several SAC5 genomes from  
27 wastewater have protein family contents that are intermediate between those of  
28 animal-associated Saccharibacteria and Saccharibacteria from the large environmental clade  
29 (indicated by an asterisk in Fig. 3b). This finding may indicate selection within the engineered  
30 environments for variants introduced from human waste. PCoAs of proteome content among  
31 Absconditabacteria and Gracilibacteria generally showed that, with the exception of  
32 dolphin-derived genomes, animal-associated lineages are also distinct from their relatives from  
33 environmental biomes (Fig. S2). Overall, our results indicate that the CPR lineages examined

1 here have proteomes whose content and size vary substantially with their environment. This is  
2 particularly evident for animal-associated Saccharibacteria, which are notably dissimilar in their  
3 protein family content compared to environmental counterparts.

4

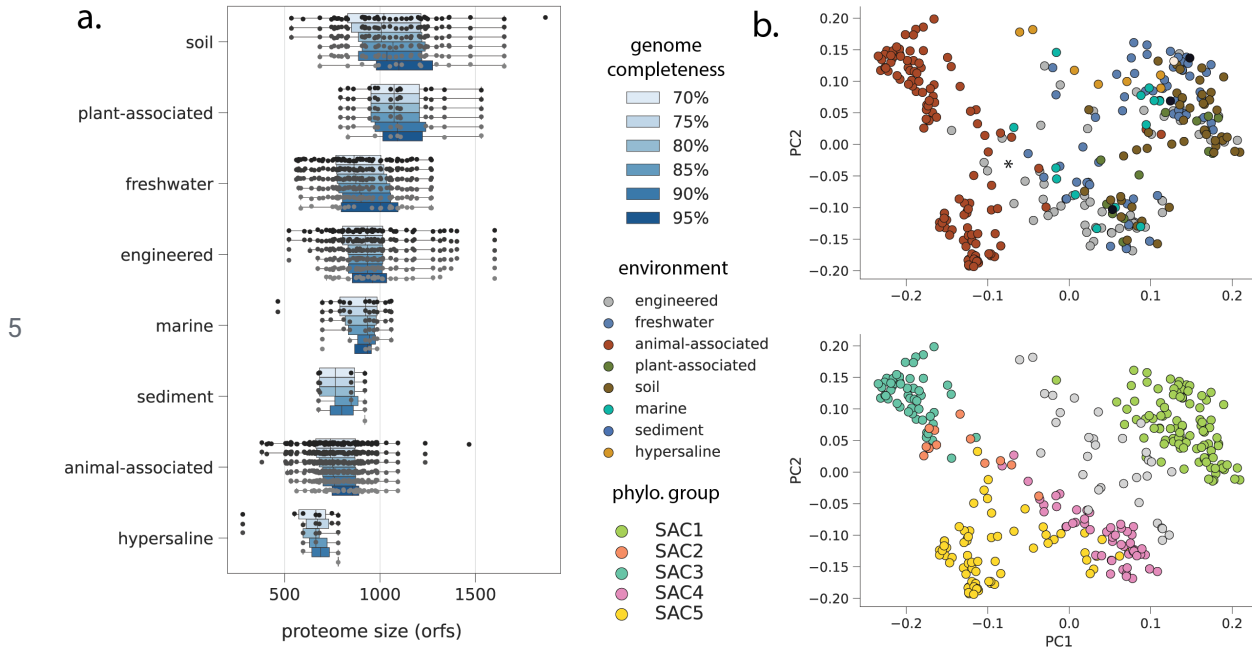

6 **Fig. 3.** Proteome characteristics for Saccharibacteria. **a)** Proteome size (open reading frame count) at  
7 increasing genome completeness thresholds. **b)** Overall proteome similarity among Saccharibacteria from  
8 different environmental categories (top panel) and phylogenetic clades (bottom panel). PCoAs were  
9 computed from presence/absence profiles of all protein clusters with 5 or more member sequences. The  
10 primary (PC1) and secondary (PC2) axis of variation explained 12% and 8% of variance, respectively.

11

12 To further examine the distinctions evident in the PCoA analysis, we arrayed presence/absence  
13 information for each protein family and hierarchically clustered them based on their distribution  
14 patterns across all three CPR phyla. This strategy allowed us to explore specific protein family  
15 distributions and to test for groups of co-occurring protein families (modules) that are common  
16 to bacteria from a single lineage or are shared by most bacteria from one or more CPR  
17 lineages. We observed one large module that is generally conserved across all genomes. This  
18 module is comprised of families for essential cellular functions such as transcription, translation,  
19 cell division, and basic energy generating mechanisms (Fig. 4a, “core”).

20

21 The protein family analysis also revealed multiple modules specific to Gracilibacteria,  
22 Absconditabacteria, and modules shared by both lineages but not present in Saccharibacteria,  
23 paralleling their phylogenetic relationships (Fig. 1a, 4a). Of the ~70 families shared only by

1 Gracilibacteria and Absconditabacteria (M2, Fig. 4a), nearly half had no above-threshold KEGG  
2 annotation. One family shared by these phyla but not in Saccharibacteria is the ribosomal  
3 protein L9, which supports prior findings on the composition of Saccharibacteria ribosomes (29).  
4 The remaining families also include two that were fairly confidently annotated as the DNA  
5 mismatch repair proteins, MutS and MutL (fam01378 and fam00753), nicking endonucleases  
6 involved in correction of errors made during replication (85) (Table S6). Despite the generally  
7 wide conservation of these proteins among Bacteria, we saw no evidence for the presence of  
8 either enzyme in Saccharibacteria, suggesting that aspects of DNA repair may vary in this group  
9 relative to other CPR. We recovered a module of approximately 60 proteins highly conserved  
10 among the Saccharibacteria and only rarely encoded in the other lineages (M5, Fig. 4a).  
11 Intriguingly, this module contained several protein families confidently annotated as core  
12 components of glycolysis and the pentose phosphate pathway, including three enzymes present  
13 in almost all CPR (10): glyceraldehyde 3-phosphate dehydrogenase, (GAPDH) triosephosphate  
14 isomerase (TIM), and phosphoglycerate kinase (PGK). These results indicate that  
15 Gracilibacteria and Absconditabacteria may have extremely patchy, if not entirely lacking,  
16 components of core carbon metabolism, even when a high-quality genome set is considered.  
17  
18 For all three lineages of CPR, we also observed numerous small modules with narrow  
19 distributions. To test whether these modules represent functions differentially distributed among  
20 organisms from different habitats, we computed ratios describing the incidence of each protein  
21 family in one habitat compared to all others (Materials and Methods). Enriched families were  
22 defined as those with ratios  $\geq 5$ , whereas depleted families were defined as those that were  
23 encoded by  $<10\%$  of genomes in a given habitat, but  $\geq 50\%$  of genomes from other habitats. To  
24 account for the fact that small families might appear to be differentially distributed due to chance  
25 alone, we also stipulated that comparisons be statistically significant ( $p \leq 0.05$ , two-sided  
26 Fisher's exact test corrected for multiple comparisons).

27

28

29

30

31

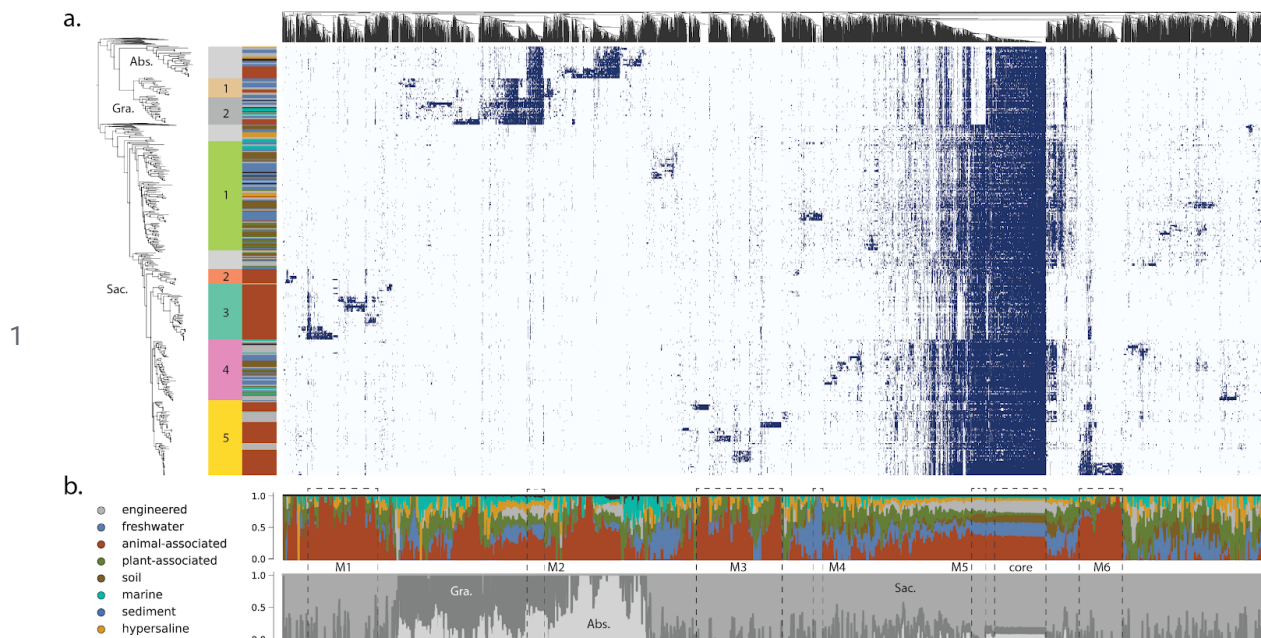

**Fig. 4.** Phylogenetic and environmental distribution of protein families recovered among CPR. **a)** Presence/absence profiles for protein families with 5 or more members, with shaded cells indicating presence, and light cells indicating absence. Heatmap columns represent protein families, hierarchically clustered by similarity in distribution across the genome set. Rows correspond to genomes, ordered by their phylogenetic position in the species tree (left). Abbreviations: Abs., Absconditabacteria; Gra., Gracilibacteria; Sac., Saccharibacteria. **b)** Percentage of genomes encoding individual protein families that belonged to broad habitat groups (top panel) or taxonomic groups (bottom panel). Modules of protein families indicated in the text are represented by dotted lines (M1-6 and 'core').

Using this approach, we identified 926 families that were either enriched ( $n=872$ ) or depleted ( $n=54$ ) in genomes from one or more broad habitat groups. We identified 45 families enriched in Absconditabacteria from animal-associated environments relative to those from environmental biomes. The majority of these families were either poorly functionally characterized or entirely without a functional annotation at the thresholds employed. Similarly, families enriched in animal-associated Gracilibacteria relative to environmental counterparts were primarily unannotated; among those families with confident annotations was a family likely encoding a phosphate: $\text{Na}^+$  symporter (fam04488) and a putative membrane protein (fam06579). Intriguingly, 6 families were co-enriched in both animal-associated Gracilibacteria and Absconditabacteria, suggesting that these sibling lineages might have acquired or retained a small complement of genes that are important in adaptation to animal habitats or their associated bacteria.

1 Animal-associated Saccharibacteria, on the other hand, encoded 417 unique families that were  
2 exclusive or highly enriched relative to those from other habitats. Enriched families largely fell  
3 into three major groups (M1, M3, M6; Fig. 4), and the large majority of them, particularly among  
4 modules with narrow, lineage-specific distributions, were without functional annotations.  
5 However, our analysis also revealed some protein families with broader distributions across  
6 multiple clades of animal-associated Saccharibacteria (Fig. 4). Here, among families with  
7 functional annotations, we found several apparently involved in the transport of amino acids and  
8 dicarboxylates that were highly enriched (ratios ranging from 10 to 112.9) in the majority of  
9 animal-associated Saccharibacteria (52-58% of genomes across clades) (Table S7). Two of  
10 these families, corresponding to a putative amino acid transport permease and  
11 substrate-binding protein (fam00393 and fam11477, respectively) were co-located in some  
12 genomes along with a ATP-binding protein (subset of fam00001), suggesting that they may  
13 function together to uptake amino acids. We also recovered several other functions that were  
14 previously predicted to be enriched based on analysis of a smaller set of animal-associated  
15 Saccharibacteria (4), including phosphoglycerate mutase, glycogen phosphorylase, and a  
16 uracil-DNA glycosylase (ratio 8.3-33.5). Lastly, we found that the CRISPR-associated protein  
17 cas9 was moderately enriched among animal-associated genomes (ratio ~5 among 33  
18 genomes), consistent with the suggestion that these Saccharibacteria likely acquired their viral  
19 defense systems after colonizing animals (4).

20

21 We identified multiple families that are either enriched or depleted in animal-associated  
22 Saccharibacteria that were functionally related to oxidative stress. Among enriched families, one  
23 (fam00662) set was mostly annotated with low confidence as rubrerythrin, a family of iron  
24 containing proteins generally involved in detoxification of peroxide (86). Member sequences of  
25 this family were present in over a third of animal-associated Saccharibacteria and were highly  
26 enriched relative to environmental genomes (fold-enrichment ratio of 36.2), suggesting that  
27 acquisition may have conferred an adaptive benefit in the gut and/or oral cavity. In contrast, we  
28 also observed that animal-associated Saccharibacteria were significantly depleted in another  
29 family confidently annotated as a Fe-Mn family superoxide dismutase (fam01569) and likely  
30 involved in radical detoxification. Animal-associated lineages were also strongly depleted for the  
31 genes comprising the cytochrome o ubiquinol oxidase operon (fam00281, fam00112, fam01347,  
32 fam00624, and fam10494), with very few, if any, animal-associated genomes and more than  
33 50% of environmental genomes encoding each of the five genes. This operon has been

1 previously suggested to confer an advantage in aerophilic environments like soil through  
2 detoxification (3) or use of oxygen (12, 13).  
3  
4 Among genomes from environmental biomes, we identified a module of approximately 100  
5 protein families, also primarily without functional annotation, that were associated with a  
6 subclade of Saccharibacteria recently reconstructed from metagenomes of freshwater lakes and  
7 glacier ice (M4, Fig. 4) (61, 87). Intriguingly, among the most widespread families in this module  
8 was one in which sequences were annotated as bacteriorhodopsin with low confidence  
9 (fam11249). Phylogenetic analysis suggests that these sequences fall within the  
10 bacterial/archaeal Type 1 rhodopsin clade and encode the 7 transmembrane helices and  
11 retinal-binding lysine associated with light sensitivity (Fig. S3). However, their specific function in  
12 CPR bacteria remains unclear. Additionally, a family of sequences relatively strongly annotated  
13 as a family of manganese efflux pumps (fam02614) were also enriched in this module.  
14 Genomes of soil-associated Saccharibacteria were enriched for about 130 protein families  
15 largely without strong functional annotations (Fig. 3). Despite their small proteome sizes,  
16 Saccharibacteria from hypersaline environments were only statistically depleted in about 15  
17 families at the thresholds employed here. Sequence files for all protein families, including  
18 enriched families, are provided in the Supplementary Materials (File S2).  
19



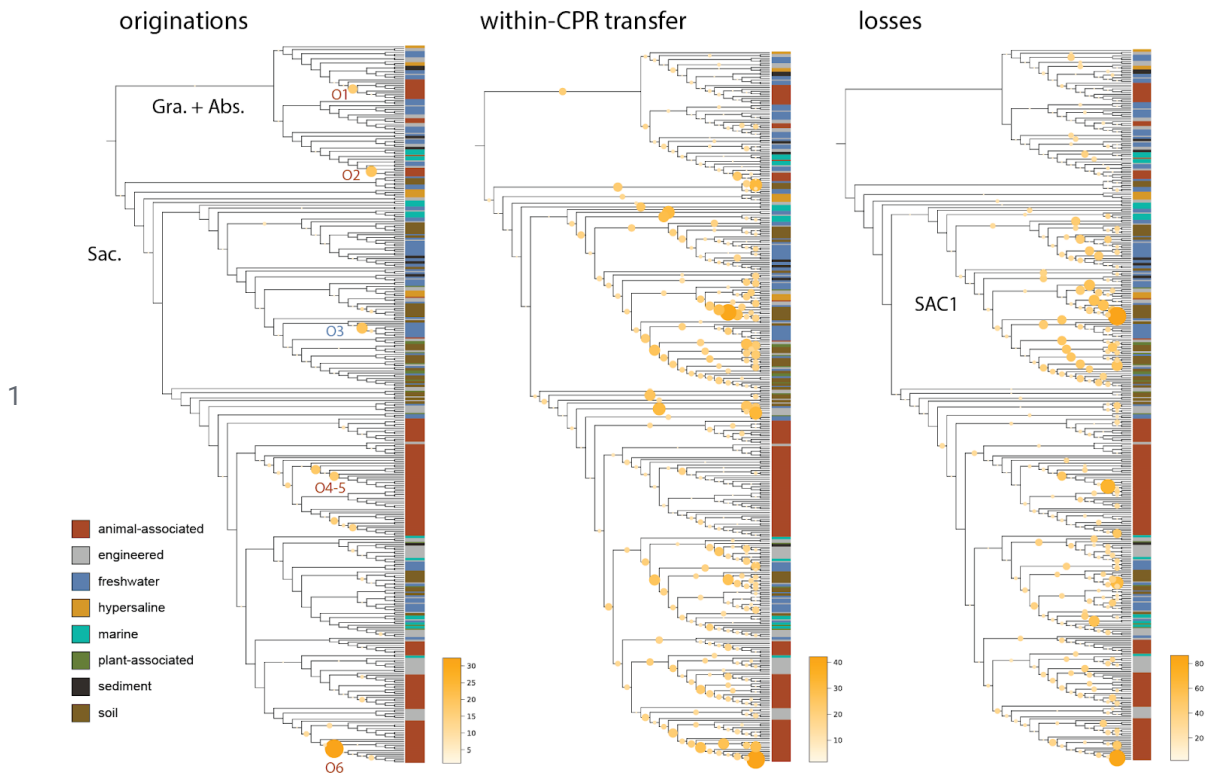

2 **Fig. 5.** Evolutionary processes shaping proteome evolution in three lineages of CPR bacteria. Each panel  
3 displays the species tree from Fig. 1 in cladogram format, onto which are mapped cumulative counts of a)  
4 origins (defined as either lateral transfer from outside the lineages examined here, or *de novo*  
5 evolution) b) transfer among the included CPR lineages and c) genomic losses of the 902 differentially  
6 distributed families for which gene-species tree reconciliations were possible. Abbreviations: Abs.,  
7 Abconditabacteria; Gra., Gracilibacteria; Sac., Saccharibacteria. SAC1 indicates a monophyletic clade of  
8 Saccharibacteria referenced in the text.

9

## 10 *Evolutionary processes shaping proteome evolution*

11

12 The observation that some differentially distributed traits among CPR were apparently lineage  
13 specific, whereas others were more widespread, motivated us to examine the relative  
14 contributions of gene transfer and loss to proteome evolution. To do so, we first inferred  
15 unrooted, maximum-likelihood phylogenies for the sequences in each protein family that was  
16 differentially distributed, then compared these phylogenies to the previously reconstructed  
17 species tree (Materials and Methods). For each family, the likelihood of transfer and loss events  
18 on each branch of the species tree were then estimated using a probabilistic framework that  
19 takes into consideration genome incompleteness, variable rates of transfer and loss, and  
20 uncertainty in gene tree reconstruction (88, 89). The results of this analysis reveal relatively few

1 instances of originations, defined as lateral transfer from outside the three lineages of CPR or  
2 *de novo* evolution ('originations', Fig. 5). In the Absconditabacteria and Gracilibacteria,  
3 gene-species tree reconciliation revealed that small modules of families of mostly hypothetical  
4 proteins were acquired near the base of animal-associated clades (O1-O2, Fig. 5). On the other  
5 hand, in Saccharibacteria, originations were primarily associated with shallower subclades of  
6 animal-associated (and in one case, freshwater) genomes (O3-O6, Fig. 5). These findings  
7 generally corresponded with the distribution of small, highly enriched modules of largely  
8 hypothetical proteins (Fig. 4) and suggest that the distribution of these modules is best  
9 explained by lineage-specific acquisition events of relatively few genes at one time, rather than  
10 large acquisition events at deeper nodes. Intriguingly, one subclade of animal-associated  
11 Saccharibacteria had the highest incidence of originations of all groups in our analysis (O6),  
12 suggesting that these genomes may be phylogenetic 'hotspots' for transfer.

13

14 While origination events were relatively infrequent in all three CPR lineages, instances of  
15 within-CPR transfer and loss were very frequent and dispersed across most interior branches of  
16 the tree (Fig. 5). Notably, we detected sporadic losses across internal branches, which is  
17 inconsistent with a major gene loss event at the time of adaptation to animal-associated  
18 habitats. Surprisingly, we noticed that genomes of non-animal associated Saccharibacteria,  
19 particularly those from the SAC1 clade, displayed substantial patterns of loss despite their  
20 relatively large proteome sizes. Thus, losses in these environmental lineages were possibly  
21 balanced by lateral transfer events over the course of evolution.

22

23

## 24 **DISCUSSION:**

25

26 Here, we expand sampling of genomes from the Absconditabacteria, Gracilibacteria, and  
27 Saccharibacteria, particularly from environmental biomes. The basal positioning of  
28 environmental clades in phylogenetic reconstructions provides strong support for the hypothesis  
29 that these lineages originated in the environment (Fig. 1a), and potentially migrated into humans  
30 and terrestrial animals via consumption of groundwater (4, 41). Unlike the Absconditabacteria,  
31 which appear to have transitioned only once into animal oral cavities and guts, our phylogenetic  
32 evidence suggests that Gracilibacteria and Saccharibacteria have undergone multiple  
33 transitions into the animal microbiome in unique phylogenetic clades. This includes

1 Saccharibacteria and Gracilibacteria from the dolphin mouth that appear to have colonized  
2 these marine mammals from a distinct source compared to those that colonized the oral  
3 environments of terrestrial animals (Fig. 1). In other clades, phylogenetically interspersed  
4 environmental and oral/gut Saccharibacteria could reflect either independent migrations into the  
5 animal environment or lineage-specific reversion back to environmental niches (SAC2-5, Fig. 1).

6  
7 Currently, the mechanisms that enable environmental transition among CPR are unknown.  
8 Several observations, including that CPR host-pairs may be taxonomically distinct between oral  
9 and gut habitats, raise the question of whether habitat transitions among CPR involve  
10 co-migration with their hosts or the acquisition of new hosts. The finding that single CPR  
11 species co-occur with a single Actinobacteria species, or several closely related ones, in  
12 multiple animal-associated metagenomes contributes further evidence that these associations  
13 can be flexible and phylogenetically diverse rather than highly evolutionarily conserved (44).  
14 Supporting this, some laboratory strains of oral Saccharibacteria can adapt to new hosts after  
15 periods of living independently (90). The lack of evidence for lateral gene transfer between  
16 experimentally profiled pairs (4) also suggests that some CPR-host pairs may have established  
17 fairly recently.

18  
19 Host associations for Absconditabacteria, Gracilibacteria, and environmental Saccharibacteria  
20 are currently unknown. Previously, changes in abundance over a sample series from a  
21 bioreactor system treating thiocyanate was used to suggest that *Microbacterium ginsengisoli*  
22 may serve as a host for a co-occurring Saccharibacteria (55). One Absconditabacteria lineage  
23 (*Vampirococcus*) has been predicted to have a host from the Gammaproteobacteria (84) and  
24 one Gracilibacteria was suggested to have a *Colwellia* host based on a shared repeat protein  
25 motif (11). Given the scant information on hand about possible hosts for these CPR, especially  
26 for Absconditabacteria and Gracilibacteria, the patterns of co-occurrence we report for specific  
27 organisms provide starting points for host identification via targeted co-isolation.

28  
29 To evaluate to what extent changes in gene content are associated with habitat transition, we  
30 first established core gene sets indicated that overall proteome size and content differed  
31 between environmental and animal-associated Saccharibacteria, and to some extent  
32 Gracilibacteria. Despite overall smaller proteome size, we identified a large number of protein  
33 families that were highly enriched among animal-associated CPR from all three lineages. The

1 most striking capacities involve amino acid transport, oxidative stress tolerance, and viral  
2 defense, which may enable use of habitat-specific resources or tolerance of habitat-specific  
3 stressors. These findings complement previous suggestions that prophages are enriched in  
4 animal-associated Saccharibacteria relative to environmental counterparts (14).

5

6 Only three lineages of CPR (of potentially dozens) have been consistently recovered in the  
7 animal-associated microbiome. Given the enormous diversity of CPR bacteria in drinking water  
8 (41), there has likely been ample opportunity for various taxa to disperse into the mouths of  
9 terrestrial animals; however, establishment and persistence of these bacteria may have been  
10 limited by the absence of a suitable host in oral and gut environments. Thus, we predict that  
11 other CPR bacteria - including those from the large Microgenomates and Parcubacteria  
12 lineages - have hosts that are infrequent or transient members of the animal microbiome, or  
13 have insufficient ability to 'adapt' to new hosts upon contact. For example, formation of new  
14 associations may be limited by the specificity of pili involved in host interaction or proteins  
15 involved in attachment (14, 41, 91).

16

17 It is also interesting to compare processes of habitat transition in CPR with those proposed for  
18 other bacteria and for archaea. Our results suggest that Saccharibacteria (and potentially  
19 Gracilibacteria) from the human/animal microbiome have smaller genome sizes than related,  
20 deeper-branching lineages of environmental origin. This pattern is also apparent for other,  
21 free-living groups adapted to the animal microbiome from the environment, like the  
22 Elusimicrobia (92) and intracellular symbionts of insects (93). Furthermore, in contrast to  
23 findings for Elusimicrobia, where host-associated lineages have common patterns of loss of  
24 metabolic capacities compared to relatives from non-host environments (92), patterns of gene  
25 loss in animal-associated CPR appear to be heterogeneous and lineage-specific. One  
26 possibility is that gene loss in CPR is primarily modulated by strong dependence on host  
27 bacteria, whose capacities may vary substantially, rather than by adaptation to the relatively  
28 stable, nutrient-rich animal habitat that likely shaped evolution of some non-CPR bacteria.

29

30 Changes in gene content could enable, facilitate, or follow habitat transitions. Our evolutionary  
31 reconstructions revealed that habitat-specific differences in gene content are more likely the  
32 product of combinations of intra-CPR transfer and loss rather than major acquisition events at  
33 time of lineage divergence. Thus, modules enriched in specific lineages were probably acquired

1 via lateral transfer after habitat transition, suggesting that proteome remodeling has been  
2 continuous in CPR over evolutionary time. As such, the processes shaping CPR lineage  
3 evolution share both similarities and differences with those predicted for other microbes,  
4 including Haloarchaeota (94) and ammonia-oxidizing lineages of Thaumarchaeota (88, 95),  
5 where both large lateral transfer events and gradual patterns of gene loss, gain, and duplication  
6 worked together to shape major habitat transitions.

7

## 8 **CONCLUSION:**

9

10 Overall, our findings highlight factors associated with habitat transitions in three CPR lineages  
11 that occur in both human/animal and environmental microbiomes. We expand the evidence for  
12 niche-based differences in protein content (4, 14) and identify a large set of protein families that  
13 could guide future studies of CPR symbiosis. Furthermore, patterns of co-occurrence may  
14 inform experiments aiming to co-cultivate CPR and their hosts. Our analyses point to a history  
15 of continuous genome remodeling accompanying transition into human/animal habitats, rather  
16 than rapid gene gain/loss around the time of habitat switches. Thus, habitat transitions in CPR  
17 may have been primarily driven by the availability of suitable hosts and reinforced by acquisition  
18 and/or loss of genetic capacities. These processes may be distinct from those shaping  
19 transitions in other bacteria and archaea that are not obligate symbionts of other  
20 microorganisms.

21

## 22 **MATERIALS AND METHODS:**

23

### 24 *Genome database preparation and curation*

25

26 To compile an environmentally comprehensive set of genomes from the selected CPR lineages,  
27 we first queried four genomic information databases - GTDB (<https://gtdb.ecogenomic.org/>),  
28 NCBI assembly (<https://www.ncbi.nlm.nih.gov/assembly>), PATRIC (<https://www.patricbrc.org/>),  
29 and IMG (<https://img.jgi.doe.gov/>) - for records corresponding to the Absconditabacteria,  
30 Gracilibacteria, and Saccharibacteria genomes. Genomes gathered from these databases were  
31 combined with those drawn from several recent publications as well as genomes newly binned  
32 from metagenomic samples of sulfidic springs, an advanced treatment system for potable reuse  
33 of wastewater, human saliva, cyanobacterial mats, fecal material from primates, baboons, pigs,  
34 goats, cattle, and rhinoceros, several deep subsurface aquifers, dairy-impacted groundwater  
35 and associated enrichments, multiple bioreactors, soil, and sediment (Table S1). Assembly,  
36 annotation, and binning procedures followed those from Anantharaman et al. 2016. In some  
37 cases, manual binning of the alternatively coded Absconditabacteria was aided by a strategy in

1 which a known Absconditabacteria gene was blasted against predicted metagenome scaffolds  
2 to find ‘seed’ scaffolds, whose coverage and GC profile were used to probe remaining scaffolds  
3 for those with similar characteristics. For newly binned genomes, genes were predicted for  
4 scaffolds > 1 kb using prodigal (meta mode) and annotated using usearch against the KEGG,  
5 UniProt, and UniRef100 databases. Bins were ‘polished’ by removing potentially contaminating  
6 scaffolds with phylogenetic profiles that deviated from consensus taxonomy at the phylum level.  
7 One genome was further manually curated to remove scaffolding errors identified by read  
8 mapping, following the procedures outlined in (96).

9

10 We removed exact redundancy from the combined genome set by identifying identical genome  
11 records and selecting one representative for downstream analyses. We then computed  
12 contamination and completeness for the genome set using a set of 43 marker genes sensitive to  
13 described lineage-specific losses in the CPR (29, 31) using the custom workflow in checkm  
14 (97). Results were used to secondarily filter the genome set to those with  $\geq 70\%$  of the 43  
15 marker genes present and  $\leq 10\%$  of marker genes duplicated. The resulting genomes were then  
16 de-replicated at 99% ANI using dRep (-sa 0.99 -comp 70 -con 10) (98), yielding a set of 389  
17 non-redundant genomes. Existing metadata were used to assign both “broad” and “narrow”  
18 habitat of origin for each non-redundant genome. Curated metadata, along with  
19 accession/source information for each genome in the final set, is available in Table S1. All newly  
20 binned genomes are available through Zenodo (Data and Software Availability).

21

## 22 *Functional annotation and phylogenomics*

23

24 We predicted genes for each genome using prodigal (“single” mode), adjusting the translation  
25 table (-g 25) for Gracilibacteria and Absconditabacteria, which are known to utilize an alternative  
26 genetic code (7, 8). Predicted proteins were concatenated and functionally annotated using  
27 kofamscan (99). Results with an e-value  $\leq 1e-6$  were retained and subsequently filtered to yield  
28 the highest scoring hit for each individual protein.

29

30 To create a species tree for the CPR groups of interest, functional annotations from kofamscan  
31 were queried for 16 syntenic ribosomal proteins (rp16). Marker genes were combined with those  
32 from a set of representative sequences of major, phylogenetically proximal CPR lineages (10).  
33 Sequences corresponding to each ribosomal protein were separately aligned with MAFFT and  
34 subsequently trimmed for phylogenetically informative regions using BMGE (-m BLOSUM30)  
35 (100). We then concatenated individual protein alignments, retaining only genomes for which at  
36 least 8 of 16 syntenic ribosomal proteins were present. A maximum-likelihood tree was then  
37 inferred for the concatenated rp16 (1976 amino acids) set using ultrafast bootstrap and  
38 IQTREE’s extended Free-Rate model selection (-m MFP -st AA -bb 1000) (101). The maximum  
39 likelihood tree is available as File S1. The tree and associated metadata were visualized in iTol  
40 (102) where well-supported, monophyletic subclades were manually identified within  
41 Gracilibacteria and Saccharibacteria for use in downstream analysis.

42

43

## 1 *Abundance analysis*

2

3 To assess the global abundance of Absconditabacteria, Gracilibacteria, and Saccharibacteria,  
4 we manually compiled the original read data associated with each genome in the analysis set,  
5 where available. We included only those genomes from short-read, shotgun metagenomics of  
6 microbial entire communities (genomes derived from single cell experiments, stable isotope  
7 probing experiments, “mini” metagenomes, long-read sequencing experiments, and co-cultures  
8 were excluded). For each sequencing experiment, we downloaded the corresponding raw reads  
9 and, where appropriate, filtered out animal-associated reads by mapping to the host genome  
10 using bbdduk (*qhdist=1*). Sequencing experiments downloaded from the NCBI SRA database  
11 were sub-sampled to the average number of reads across all compiled experiments (~36  
12 million) using seqtk (*sample -s 7*) if the starting read pair count exceeded 100 million. We then  
13 removed Illumina adapters and other contaminants from the remaining reads and further quality  
14 trimmed them using Sickle. The filtered read set was then mapped against all genomes  
15 assembled (or co-assembled) from it using bowtie2 (default parameters). For mappings with a  
16 non-zero number of read alignments, relative abundance of each genome was calculated by  
17 counting the number of stringently mapped ( $\geq 99\%$  identity) using *coverm*  
18 (*--min-read-percent-identity 0.99*) and dividing by the total number of reads in the quality-filtered  
19 read set. Genomes were considered present in a sample if at least 10% of sequence length was  
20 covered by reads. In cases where genomes were derived from co-assemblies of multiple  
21 sequencing experiments, we computed the abundance for each sample individually and then  
22 selected the one with the highest value as a ‘representative’ sample for downstream analyses.

23

## 24 *Co-occurrence analyses*

25

26 Each representative sample was then probed for co-occurrence patterns of CPR and potential  
27 host lineages. To account for across-study differences in binning procedures, quality-filtered  
28 read sets were re-assembled using megahit (*--min-contig-len 1000*) and subsequently analyzed  
29 using graftm (103) with a ribosomal protein S3 (*rps3*) gpackage custom built from GTDB  
30 (release 05-RS95). Recovered *rps3* protein sequences in each sample were clustered to form  
31 ‘species groups’ at 99% identity using *usearch cluster\_fast (-sort length -id 0.99)*. For all  
32 samples with  $>0$  marker hits, we then performed three downstream analyses to examine  
33 patterns of co-occurrence for various taxa. First, we counted the number of unique species  
34 groups in each sample taxonomically annotated as Saccharibacteria (“*c\_\_Saccharimonadia*”)  
35 and Actinobacteria (“*p\_\_Actinobacteriota*”), dividing the former by the latter to compute a  
36 species ‘richness ratio’ for each sample (where *p\_\_Actinobacteria* did not equal 0).

37

38 Second, to examine the co-occurrence of Saccharibacteria and Actinobacteria within a  
39 phylogenetic framework, we inferred maximum likelihood trees for the set of *rps3* marker genes  
40 recovered across samples. Species group sequences were clustered *across* samples to further  
41 reduce redundancy using *usearch* (as described above) and were combined with *rps3*  
42 sequences drawn from a taxonomically balanced set of bacterial reference genomes (10) as an  
43 outgroup. Saccharibacteria and Actinobacteria sequence sets were then aligned, trimmed, and

1 used to build trees as described above for the 16 ribosomal protein tree, with the exception of  
2 using trimal (*-gt 0.1*) (104) instead of BMGE. Species groups that co-occurred in one or more  
3 metagenomic samples were then linked. If a given Saccharibacteria species group exclusively  
4 co-occurred with an Actinobacteria species group in *at least* one sample, or Actinobacteria  
5 species groups belonging to the same order level in *all* samples, those linkages were labelled.  
6 Finally, experimental co-cultures of Saccharibacteria and Actinobacteria from previous studies  
7 were mapped onto the trees. To do this, we compiled a list of strain pairs and their  
8 corresponding genome assemblies (Table S3) and then used graftm to extract rps3 sequences  
9 from corresponding genome assemblies downloaded from NCBI. We then matched these rps3  
10 sequences to their closest previously defined species group using blastp (*-evaluate 1e-3*  
11 *-max\_target\_seqs 10 -num\_threads 16 -sorthits 3 -outfmt 6*), prioritizing hits with the highest  
12 bitscore and alignment length. Reference rps3 sequences with no match at  $\geq 99\%$  identity and  
13  $\geq 95\%$  coverage among the species groups were inserted separately into the tree. We then  
14 labelled all experimental pairs of species in the linkage diagram.

15

16 Third, we profiled a subset of 43 metagenomes containing Gracilibacteria and  
17 Absconditabacteria for overall community composition. For each sample, we extracted all  
18 contigs bearing ribosomal S3 proteins and mapped the corresponding quality filtered read set to  
19 them using bowtie2. Mean coverage for each contig was then computed using coverm (*contig*  
20 *--min-read-percent-identity .99*) and a minimum covered fraction of 0.10 was again employed.  
21 Relative coverage for each order level lineage (as predicted by graftm) was computed by  
22 summing the mean coverage values for all rps3-bearing contigs belonging to that lineage.  
23 Where species groups did not have order-level taxonomic predictions, the lowest available rank  
24 was used. Finally, relative coverage values were scaled by first dividing by the lowest relative  
25 coverage observed across samples and then taking the base-10 log. For the re-analysis of 22  
26 cyanobacterial mat metagenomes (32), the same approach was taken, and coverage profiles for  
27 rps3-bearing scaffolds were correlated using the pearsonr function in the scipy.stats package.

28

29 *Proteome size, content, enrichment*

30

31 We subjected all predicted proteins from the genome set to a two-part, de novo protein  
32 clustering pipeline recently applied to CPR genomes, in which proteins are first clustered into  
33 “subfamilies” and highly similar/overlapping subfamilies are merged using and HMM-HMM  
34 comparison approach (*--coverage 0.70*) (9) (<https://github.com/raphael-upmc/proteinClustering-Pipeline>). For each protein cluster, we recorded the most common KEGG annotation among its  
35 member sequences and the percent of sequences bearing this annotation (e.g. 69% of  
36 sequences in fam00095 were matched with K00852).

37

38  
39 We then performed three subsequent analyses to describe broad proteome features of included  
40 CPR. First, we computed proteome size across habitats, defined as the number of predicted  
41 ORFs per genome when considering genomes at increasing thresholds of completeness in  
42 single copy gene inventories (75%, 80%, 85%, etc.). Second, we examined similarity between  
43 proteomes by generating a matrix describing the presence/absence patterns of protein families



1 with 5 or more member sequences. We then used this matrix to compute distance metrics  
2 between each genome based on protein content using the `ecopy` package in Python  
3 (`method='jaccard'`, `transform='1'`) and performing a principal coordinates analysis (PCoA) using  
4 the `skbio` package. The first two axes of variation were retained for visualization alongside  
5 environmental and phylogenetic metadata. Finally, we used the `clustermap` function in `seaborn`  
6 (`metric='jaccard'`, `method='average'`) to hierarchically cluster the protein families based on their  
7 distribution patterns and plot these patterns across the genome set. For each protein family, we  
8 also computed the proportion of genomes encoding at least one member sequence that  
9 belonged to each of the three CPR lineages and each broad environmental category (Fig. 4b)  
10 (see custom code linked in Data and Software Availability).

11

12 We next identified protein families that were differentially distributed among genomes from  
13 broad environmental categories. For each protein family, we divided the fraction of genomes  
14 from a given habitat ('in-group') encoding the family by the same fraction for genomes from all  
15 other habitats ('out-group'). In cases where no 'out-group' genome encoded a member protein,  
16 the protein family was simply noted as 'exclusive' to the 'in-group' habitat. In all cases, we  
17 calculated the Fisher's exact statistic using the `fisher_exact` function in `scipy.stats`  
18 (`alternative='two-sided'`). To account for discrepancies in genome sampling among lineages, we  
19 determined ratios and corresponding statistical significance values separately for each lineage.  
20 All statistical comparisons for a given lineage were corrected for false discovery rate using the  
21 `multitests` function in `statsmodels.stats.multitest` (`method="fdr_bh"`). Finally, we selected  
22 families that were predicted to be enriched or depleted in particular habitats. We considered  
23 enriched families to be those with ratios  $\geq 5$ , and depleted families as those that were encoded  
24 in 10% or fewer of genomes from a given habitat but present in 50% or more of genomes  
25 outside that environmental category. Retaining only those comparisons with corrected Fisher's  
26 statistics at 0.05 or below resulted in a set of 926 unique, differentially distributed protein  
27 families for downstream analysis.

28

### 29 *Analysis of putative bacteriorhodopsins*

30

31 Protein sequences from the CPR (fam11249) were combined with a set of reference protein  
32 sequences spanning Type 1 bacterial/archaeal rhodopsin and heliorhodopsin (105). Sequences  
33 were then aligned using MAFFT (`--auto`) and a tree was inferred using FastTreeMP (default  
34 parameters). Alignment columns with 95% or more gaps were trimmed manually in Geneious  
35 for the purposes of visualization. Transmembrane domains were identified by BLASTp searches  
36 (<https://blast.ncbi.nlm.nih.gov/Blast.cgi>) and conserved residues were defined by manual  
37 comparison with an annotated alignment of previously published reference sequences (106).

38

### 39 *Processes driving protein family evolution*

40

41 To examine the evolutionary processes shaping the differentially-distributed protein families, we  
42 next subjected each family to an automated gene-species tree reconciliation workflow adapted  
43 from (88). Briefly, for each family, truncated sequences (defined as those with lengths less than

1 2 standard deviations from the family mean) were removed and the remaining sequences  
2 aligned with MAFFT (*--retree 2*). Resulting alignments were then trimmed using trimal (*-gt 0.1*)  
3 and used to infer maximum-likelihood phylogenetic trees using IQTree with 1000 ultrafast  
4 bootstrap replicates (*-bnni -m TEST -st AA -bb 1000 -nt AUTO*). We removed reference  
5 sequences from the inferred species tree and rooted it on the branch separating  
6 Saccharibacteria from the monophyletic clade containing Gracilibacteria and  
7 Absconditabacteria. A random sample of 100 bootstrap replicates were then used to  
8 probabilistically reconcile each protein family with the pruned species tree using the ALE  
9 package (*ALE\_undated*) (89). Estimates of missing gene fraction were derived from the checkM  
10 genome completeness estimates described above. We then calculated the total number of  
11 originations (horizontal gene transfer from non-CPR, or *de novo* gene formation), within-CPR  
12 horizontal transfers, and losses over each non-terminal branch and mapped branch-wise counts  
13 for each event to a species-tree cladogram in iTol (102).

14

#### 15 **SUPPLEMENTARY MATERIAL:**

16

17 All supplementary figures, tables, and files are available through Zenodo  
18 (<https://doi.org/10.5281/zenodo.4560555>).

19

20 **Fig. S1.** Proteome size as a function of genome completeness and habitat of origin for  
21 Absconditabacteria and Gracilibacteria.

22

23 **Fig. S2.** Principal coordinates analysis based on all protein families with 5 or more members  
24 among **ab**) all lineages, **c**) Absconditabacteria, and **d**) Gracilibacteria.

25

26 **Fig. S3.** Phylogenetic relationships and masked protein alignment among Type 1 rhodopsins  
27 and CPR bacteriorhodopsin homologs. CPR sequences from the Absconditabacteria,  
28 Gracilibacteria, and Saccharibacteria are highlighted in the tree. Sequence conservation at each  
29 aligned site and the retinal-binding Schiff Base are also indicated.

30

31 **File S1.** Absconditabacteria, Gracilibacteria, and Saccharibacteria species tree based on 16  
32 syntenic ribosomal proteins (newick format).

33

34 **File S2.** FASTA-formatted files for 3,787 protein families with 5 or more member sequences.

35

36 **Table S1.** Characteristics of genomes used in this study, including environmental metadata and  
37 accession information.

38

39 **Table S2.** Read accession and mapping information for genomes included in the global  
40 abundance analysis.

41

1 **Table S3.** Metadata and ribosomal protein S3 (rpS3) information for experimentally validated  
2 Saccharibacteria-Actinobacteria pairs. Only strains with publicly available reference genomes  
3 and detectable rpS3 sequences are listed.

4  
5 **Table S4.** Pairs of Saccharibacteria-Actinobacteria species groups with exclusive co-occurrence  
6 at the species group or order level in the included metagenomic samples.

7  
8 **Table S5.** Top 25 coverage correlations between Absconditabacteria and other organisms (as  
9 denoted by representative rpS3-bearing scaffolds) across 22 cyanobacterial mat metagenomes.

10  
11 **Table S6.** Characteristics of the 3,787 protein families with 5 or more member sequences.

12  
13 **Table S7.** Characteristics of protein families that are statistically enriched/depleted across  
14 habitat categories.

15  
16 **Acknowledgments:**

17  
18 We thank Rohan Sachdeva, Shufei Lei, Lily Law, Alex Crits-Christoph, Tom Williams, Simonetta  
19 Gribaldo, Alexa Nicolas, Jett Liu, Adair Borges, Raphaël Méheust, and Alison Sharrar for  
20 informatics support, helpful discussions, and comments on the manuscript. We thank Alex  
21 Thomas, Ariel Amadio, Mircea Podar, Ramunas Stepanauskas, Connor Skennerton, Stefano  
22 Campanaro, Cédric Laczny, Clara Chan, Scott E. Miller, Lauren C. Kennedy, Rose S. Kantor,  
23 Kara L. Nelson, Lauren Lui, Maliheh Mehrshad, Chris Greening, Mads Albertsen, and Sari  
24 Peura for permission to use genomic data that were unpublished at the time of writing.

25  
26 Christine He was funded by a Camille & Henry Dreyfus Environmental Chemistry Postdoctoral  
27 Fellowship. Patrick Munk was supported by the Danish Veterinary and Food Administration and  
28 The Novo Nordisk Foundation (NNF16OC0021856). JAEA was funded by the Ministry of  
29 Economy, Trade and Industry of Japan, as “The Project for Validating Near-field System  
30 Assessment Methodology in Geological Disposal System”. Keith Bouma-Gregson and  
31 cyanobacterial mat sample funding collection was supported by Support was pro by the National  
32 Science Foundation’s Eel River Critical Zone Observatory [EAR-1331940], Department of  
33 Energy grant [DOE-SC10010566, NSF Division of Environmental Biology [1656009] and US  
34 EPA STAR Fellowship [91767101-0].

35  
36 **Author’s contributions:** A.L.J and J.F.B. compiled the dataset, performed genome curation  
37 and analysis, developed the project, and wrote the manuscript. C.H., R.K., L.E.V.A., P.M.,  
38 K.B.G., Y.A., and P.T.W. generated data for the study and provided comments on the  
39 manuscript.

40  
41 **Data and software availability:** All accession information for the genomes analyzed in this  
42 study are listed in Supplementary Table 1. Genomes as well as custom code for the described  
43 analyses are also available on GitHub: <https://github.com/alexanderjaffe/cpr-crossenv>.

1 All supplementary figures, tables, and files are available through Zenodo  
2 (<https://doi.org/10.5281/zenodo.4560555>).

3

#### 4 REFERENCES:

- 5 1. Wrighton KC, Thomas BC, Sharon I, Miller CS, Castelle CJ, VerBerkmoes NC, Wilkins MJ,  
6 Hettich RL, Lipton MS, Williams KH, Long PE, Banfield JF. 2012. Fermentation, hydrogen,  
7 and sulfur metabolism in multiple uncultivated bacterial phyla. *Science* 337:1661–1665.
- 8 2. Albertsen M, Hugenholtz P, Skarshewski A, Nielsen KL, Tyson GW, Nielsen PH. 2013.  
9 Genome sequences of rare, uncultured bacteria obtained by differential coverage binning of  
10 multiple metagenomes. *Nat Biotechnol* 31:533–538.
- 11 3. Kantor RS, Wrighton KC, Handley KM, Sharon I, Hug LA, Castelle CJ, Thomas BC,  
12 Banfield JF. 2013. Small genomes and sparse metabolisms of sediment-associated  
13 bacteria from four candidate phyla. *MBio* 4:e00708–13.
- 14 4. McLean JS, Bor B, Kerns KA, Liu Q, To TT, Solden L, Hendrickson EL, Wrighton K, Shi W,  
15 He X. 2020. Acquisition and Adaptation of Ultra-small Parasitic Reduced Genome Bacteria  
16 to Mammalian Hosts. *Cell Rep* 32:107939.
- 17 5. Bor B, Bedree JK, Shi W, McLean JS, He X. 2019. Saccharibacteria (TM7) in the Human  
18 Oral Microbiome. *J Dent Res* 98:500–509.
- 19 6. Abusleme L, Dupuy AK, Dutzan N, Silva N, Burleson JA, Strausbaugh LD, Gamonal J, Diaz  
20 PI. 2013. The subgingival microbiome in health and periodontitis and its relationship with  
21 community biomass and inflammation. *ISME J* 7:1016–1025.
- 22 7. Campbell JH, O'Donoghue P, Campbell AG, Schwientek P, Sczyrba A, Woyke T, Söll D,  
23 Podar M. 2013. UGA is an additional glycine codon in uncultured SR1 bacteria from the  
24 human microbiota. *Proc Natl Acad Sci U S A* 110:5540–5545.
- 25 8. Hanke A, Hamann E, Sharma R, Geelhoed JS, Hargesheimer T, Kraft B, Meyer V, Lenk S,  
26 Osmers H, Wu R, Others. 2014. Recoding of the stop codon UGA to glycine by a  
27 BD1-5/SN-2 bacterium and niche partitioning between Alpha-and Gammaproteobacteria in  
28 a tidal sediment microbial community naturally selected in a laboratory chemostat. *Front*  
29 *Microbiol* 5:231.
- 30 9. Méheust R, Burstein D, Castelle CJ, Banfield JF. 2019. The distinction of CPR bacteria  
31 from other bacteria based on protein family content. *Nat Commun* 10:4173.
- 32 10. Jaffe AL, Castelle CJ, Matheus Carnevali PB, Gribaldo S, Banfield JF. 2020. The rise of  
33 diversity in metabolic platforms across the Candidate Phyla Radiation. *BMC Biology*.
- 34 11. Sieber CMK, Paul BG, Castelle CJ, Hu P, Tringe SG, Valentine DL, Andersen GL, Banfield  
35 JF. 2019. Unusual metabolism and hypervariation in the genome of a Gracilibacteria  
36 (BD1-5) from an oil degrading community. *bioRxiv*.
- 37 12. Starr EP, Shi S, Blazewicz SJ, Probst AJ, Herman DJ, Firestone MK, Banfield JF. 2018.  
38 Stable isotope informed genome-resolved metagenomics reveals that Saccharibacteria

- 1 utilize microbially-processed plant-derived carbon. *Microbiome* 6:122.
- 2 13. Nicolas AM, Jaffe AL, Nuccio EE, Taga ME, Firestone MK, Banfield JF. 2020. Unexpected  
3 diversity of CPR bacteria and nanoarchaea in the rare biosphere of rhizosphere-associated  
4 grassland soil. Cold Spring Harbor Laboratory.
- 5 14. Shaiber A, Willis AD, Delmont TO, Roux S, Chen L-X, Schmid AC, Yousef M, Watson AR,  
6 Lolans K, Esen ÖC, Lee STM, Downey N, Morrison HG, Dewhirst FE, Mark Welch JL, Eren  
7 AM. 2020. Functional and genetic markers of niche partitioning among enigmatic members  
8 of the human oral microbiome. *Genome Biol* 21:292.
- 9 15. Murugkar PP, Collins AJ, Chen T, Dewhirst FE. 2020. Isolation and cultivation of candidate  
10 phyla radiation Saccharibacteria (TM7) bacteria in coculture with bacterial hosts. *J Oral*  
11 *Microbiol* 12:1814666.
- 12 16. He X, McLean JS, Edlund A, Yooseph S, Hall AP, Liu S-Y, Dorrestein PC, Esquenazi E,  
13 Hunter RC, Cheng G, Nelson KE, Lux R, Shi W. 2015. Cultivation of a human-associated  
14 TM7 phylotype reveals a reduced genome and epibiotic parasitic lifestyle. *Proc Natl Acad*  
15 *Sci U S A* 112:244–249.
- 16 17. Utter DR, He X, Cavanaugh CM, McLean JS, Bor B. 2020. The saccharibacterium TM7x  
17 elicits differential responses across its host range. *ISME J*  
18 <https://doi.org/10.1038/s41396-020-00736-6>.
- 19 18. Lui LM, Nielsen TN, Arkin AP. 2020. A method for achieving complete microbial genomes  
20 and improving bins from metagenomics data. Cold Spring Harbor Laboratory.
- 21 19. Dueholm MS, Albertsen M, Stokholm-Bjerregaard M, McIlroy SJ, Karst SM, Nielsen PH.  
22 2015. Complete Genome Sequence of the Bacterium Aalborg\_AAW-1, Representing a  
23 Novel Family within the Candidate Phylum SR1. *Genome Announc* 3.
- 24 20. Ornaghi M, Prado RM, Ramos TR, Catalano FR, Mottin C, Creevey CJ, Huws SA, Prado  
25 IN. 2020. Natural plant-based additives can improve ruminant performance by influencing  
26 the Rumen microbiome. Research Square.
- 27 21. Cabello-Yeves PJ, Zemskaya TI, Zakharenko AS, Sakirko MV, Ivanov VG, Ghai R,  
28 Rodriguez-Valera F. 2020. Microbiome of the deep Lake Baikal, a unique oxic bathypelagic  
29 habitat. *Limnol Oceanogr* 65:1471–1488.
- 30 22. Dudek NK, Sun CL, Burstein D, Kantor RS, Aliaga Goltsman DS, Bik EM, Thomas BC,  
31 Banfield JF, Relman DA. 2017. Novel Microbial Diversity and Functional Potential in the  
32 Marine Mammal Oral Microbiome. *Curr Biol* 27:3752–3762.e6.
- 33 23. Andersen VD, Aarestrup FM, Munk P, Jensen MS, de Knecht LV, Bortolaia V, Knudsen BE,  
34 Lukjancenko O, Birkegård AC, Vigre H. 2020. Predicting effects of changed antimicrobial  
35 usage on the abundance of antimicrobial resistance genes in finisher' gut microbiomes.  
36 *Prev Vet Med* 174:104853.
- 37 24. Rehman ZU, Fortunato L, Cheng T, Leiknes T. 2020. Metagenomic analysis of sludge and  
38 early-stage biofilm communities of a submerged membrane bioreactor. *Sci Total Environ*

- 1 701:134682.
- 2 25. Youssef NH, Farag IF, Hahn CR, Premathilake H, Fry E, Hart M, Huffaker K, Bird E,  
3 Hambright J, Hoff WD, Elshahed MS. 2019. *Candidatus Krumholzibacterium zodletonense*  
4 gen. nov., sp nov, the first representative of the candidate phylum Krumholzibacteriota phyl.  
5 nov. recovered from an anoxic sulfidic spring using genome resolved metagenomics. *Syst*  
6 *Appl Microbiol* 42:85–93.
- 7 26. Poghosyan L, Koch H, Frank J, van Kessel MAHJ, Cremers G, van Alen T, Jetten MSM, Op  
8 den Camp HJM, Lückner S. 2020. Metagenomic profiling of ammonia- and  
9 methane-oxidizing microorganisms in two sequential rapid sand filters. *Water Res*  
10 185:116288.
- 11 27. Hernsdorf AW, Amano Y, Miyakawa K, Ise K, Suzuki Y, Anantharaman K, Probst A, Burstein  
12 D, Thomas BC, Banfield JF. 2017. Potential for microbial H<sub>2</sub> and metal transformations  
13 associated with novel bacteria and archaea in deep terrestrial subsurface sediments. *ISME*  
14 *J* 11:1915–1929.
- 15 28. Rinke C, Schwientek P, Sczyrba A, Ivanova NN, Anderson IJ, Cheng J-F, Darling A, Malfatti  
16 S, Swan BK, Gies EA, Dodsworth JA, Hedlund BP, Tsiamis G, Sievert SM, Liu W-T, Eisen  
17 JA, Hallam SJ, Kyrpides NC, Stepanauskas R, Rubin EM, Hugenholtz P, Woyke T. 2013.  
18 Insights into the phylogeny and coding potential of microbial dark matter. *Nature*  
19 499:431–437.
- 20 29. Brown CT, Hug LA, Thomas BC, Sharon I, Castelle CJ, Singh A, Wilkins MJ, Wrighton KC,  
21 Williams KH, Banfield JF. 2015. Unusual biology across a group comprising more than 15%  
22 of domain Bacteria. *Nature* 523:208–211.
- 23 30. Parks DH, Chuvochina M, Waite DW, Rinke C, Skarshewski A, Chaumeil P-A, Hugenholtz  
24 P. 2018. A standardized bacterial taxonomy based on genome phylogeny substantially  
25 revises the tree of life. *Nat Biotechnol* 36:996–1004.
- 26 31. Anantharaman K, Brown CT, Hug LA, Sharon I, Castelle CJ, Probst AJ, Thomas BC, Singh  
27 A, Wilkins MJ, Karaoz U, Brodie EL, Williams KH, Hubbard SS, Banfield JF. 2016.  
28 Thousands of microbial genomes shed light on interconnected biogeochemical processes  
29 in an aquifer system. *Nat Commun* 7:13219.
- 30 32. Bouma-Gregson K, Olm MR, Probst AJ, Anantharaman K, Power ME, Banfield JF. 2019.  
31 Impacts of microbial assemblage and environmental conditions on the distribution of  
32 anatoxin-a producing cyanobacteria within a river network. *ISME J* 13:1618–1634.
- 33 33. Engelberts JP, Robbins SJ, de Goeij JM, Aranda M, Bell SC, Webster NS. 2020.  
34 Characterization of a sponge microbiome using an integrative genome-centric approach.  
35 *ISME J* 14:1100–1110.
- 36 34. Zhou Z, Tran PQ, Kieft K, Anantharaman K. 2020. Genome diversification in globally  
37 distributed novel marine Proteobacteria is linked to environmental adaptation. *ISME J*  
38 14:2060–2077.
- 39 35. Pereira FC, Wasmund K, Cobankovic I, Jehmlich N, Herbold CW, Lee KS, Sziranyi B,

- 1 Vesely C, Decker T, Stocker R, Warth B, von Bergen M, Wagner M, Berry D. 2020. Rational  
2 design of a microbial consortium of mucosal sugar utilizers reduces *Clostridiodes difficile*  
3 colonization. *Nat Commun* 11:5104.
- 4 36. Parks DH, Rinke C, Chuvochina M, Chaumeil P-A, Woodcroft BJ, Evans PN, Hugenholtz P,  
5 Tyson GW. 2017. Recovery of nearly 8,000 metagenome-assembled genomes substantially  
6 expands the tree of life. *Nat Microbiol* 2:1533–1542.
- 7 37. Probst AJ, Ladd B, Jarett JK, Geller-McGrath DE, Sieber CMK, Emerson JB,  
8 Anantharaman K, Thomas BC, Malmstrom RR, Stieglmeier M, Klingl A, Woyke T, Ryan MC,  
9 Banfield JF. 2018. Differential depth distribution of microbial function and putative symbionts  
10 through sediment-hosted aquifers in the deep terrestrial subsurface. *Nat Microbiol*  
11 3:328–336.
- 12 38. Solden LM, Naas AE, Roux S, Daly RA, Collins WB, Nicora CD, Purvine SO, Hoyt DW,  
13 Schückel J, Jørgensen B, Willats W, Spalinger DE, Firkins JL, Lipton MS, Sullivan MB,  
14 Pope PB, Wrighton KC. 2018. Interspecies cross-feeding orchestrates carbon degradation  
15 in the rumen ecosystem. *Nat Microbiol* 3:1274–1284.
- 16 39. Robbins SJ, Singleton CM, Chan CX, Messer LF, Geers AU, Ying H, Baker A, Bell SC,  
17 Morrow KM, Ragan MA, Miller DJ, Forêt S, ReFuGe2020 Consortium, Voolstra CR, Tyson  
18 GW, Bourne DG. 2019. A genomic view of the reef-building coral *Porites lutea* and its  
19 microbial symbionts. *Nat Microbiol* 4:2090–2100.
- 20 40. Martínez Arbas S, Narayanasamy S, Herold M, Lebrun LA, Hoopmann MR, Li S, Lam TJ,  
21 Kunath BJ, Hicks ND, Liu CM, Price LB, Laczny CC, Gillece JD, Schupp JM, Keim PS,  
22 Moritz RL, Faust K, Tang H, Ye Y, Skupin A, May P, Muller EEL, Wilmes P. 2021. Roles of  
23 bacteriophages, plasmids and CRISPR immunity in microbial community dynamics  
24 revealed using time-series integrated meta-omics. *Nature Microbiology* 6:123–135.
- 25 41. He C, Keren R, Whittaker ML, Farag IF, Doudna JA, Cate JHD, Banfield JF. 2021.  
26 Genome-resolved metagenomics reveals site-specific diversity of episymbiotic CPR  
27 bacteria and DPANN archaea in groundwater ecosystems. *Nat Microbiol*  
28 <https://doi.org/10.1038/s41564-020-00840-5>.
- 29 42. Woodcroft BJ, Singleton CM, Boyd JA, Evans PN, Emerson JB, Zayed AAF, Hoelzle RD,  
30 Lamberton TO, McCalley CK, Hodgkins SB, Wilson RM, Purvine SO, Nicora CD, Li C,  
31 Frolking S, Chanton JP, Crill PM, Saleska SR, Rich VI, Tyson GW. 2018. Genome-centric  
32 view of carbon processing in thawing permafrost. *Nature* 560:49–54.
- 33 43. Nayfach S, Shi ZJ, Seshadri R, Pollard KS, Kyrpides NC. 2019. New insights from  
34 uncultivated genomes of the global human gut microbiome. *Nature* 568:505–510.
- 35 44. Cross KL, Campbell JH, Balachandran M, Campbell AG, Cooper SJ, Griffen A, Heaton M,  
36 Joshi S, Klingeman D, Leys E, Yang Z, Parks JM, Podar M. 2019. Targeted isolation and  
37 cultivation of uncultivated bacteria by reverse genomics. *Nat Biotechnol* 37:1314–1321.
- 38 45. Almeida A, Nayfach S, Boland M, Strozzi F, Beracochea M, Shi ZJ, Pollard KS, Sakharova  
39 E, Parks DH, Hugenholtz P, Segata N, Kyrpides NC, Finn RD. 2021. A unified catalog of

- 1 204,938 reference genomes from the human gut microbiome. *Nat Biotechnol* 39:105–114.
- 2 46. Fettweis JM, Serrano MG, Brooks JP, Edwards DJ, Girerd PH, Parikh HI, Huang B, Arodz  
3 TJ, Edupuganti L, Glascock AL, Xu J, Jimenez NR, Vivadelli SC, Fong SS, Sheth NU, Jean  
4 S, Lee V, Bokhari YA, Lara AM, Mistry SD, Duckworth RA 3rd, Bradley SP, Koparde VN,  
5 Orenda XV, Milton SH, Rozycki SK, Matveyev AV, Wright ML, Huzurbazar SV, Jackson EM,  
6 Smirnova E, Korfach J, Tsai Y-C, Dickinson MR, Brooks JL, Drake JI, Chaffin DO, Sexton  
7 AL, Gravett MG, Rubens CE, Wijesooriya NR, Hendricks-Muñoz KD, Jefferson KK, Strauss  
8 JF 3rd, Buck GA. 2019. The vaginal microbiome and preterm birth. *Nat Med* 25:1012–1021.
- 9 47. Bandla A, Pavagadhi S, Sridhar Sudarshan A, Poh MCH, Swarup S. 2020. 910  
10 metagenome-assembled genomes from the phytobiomes of three urban-farmed leafy Asian  
11 greens. *Sci Data* 7:278.
- 12 48. Gibson KM, Nguyen BN, Neumann LM, Miller M, Buss P, Daniels S, Ahn MJ, Crandall KA,  
13 Pukazhenthi B. 2019. Gut microbiome differences between wild and captive black  
14 rhinoceros - implications for rhino health. *Sci Rep* 9:7570.
- 15 49. Breister AM, Imam MA, Zhou Z, Ahsan MA, Noveron JC, Anantharaman K, Prabhakar P.  
16 2020. Soil microbiomes mediate degradation of vinyl ester-based polymer composites.  
17 *Communications Materials* 1:101.
- 18 50. Tully BJ, Graham ED, Heidelberg JF. 2018. The reconstruction of 2,631 draft  
19 metagenome-assembled genomes from the global oceans. *Sci Data* 5:170203.
- 20 51. Clayton JB, Vangay P, Huang H, Ward T, Hillmann BM, Al-Ghalith GA, Travis DA, Long HT,  
21 Van Tuan B, Van Minh V, Cabana F, Nadler T, Toddes B, Murphy T, Glander KE, Johnson  
22 TJ, Knights D. 2016. Captivity humanizes the primate microbiome. *Proc Natl Acad Sci U S*  
23 *A* 113:10376–10381.
- 24 52. Hu P, Dubinsky EA, Probst AJ, Wang J, Sieber CMK, Tom LM, Gardinali PR, Banfield JF,  
25 Atlas RM, Andersen GL. 2017. Simulation of Deepwater Horizon oil plume reveals  
26 substrate specialization within a complex community of hydrocarbon degraders. *Proc Natl*  
27 *Acad Sci U S A* 114:7432–7437.
- 28 53. Schulze-Makuch D, Wagner D, Kounaves SP, Mangelsdorf K, Devine KG, de Vera J-P,  
29 Schmitt-Kopplin P, Grossart H-P, Parro V, Kaupenjohann M, Galy A, Schneider B, Airo A,  
30 Frösler J, Davila AF, Arens FL, Cáceres L, Cornejo FS, Carrizo D, Dartnell L, DiRuggiero J,  
31 Flury M, Ganzert L, Gessner MO, Grathwohl P, Guan L, Heinz J, Hess M, Keppler F, Maus  
32 D, McKay CP, Meckenstock RU, Montgomery W, Oberlin EA, Probst AJ, Sáenz JS, Sattler  
33 T, Schirmack J, Sephton MA, Schloter M, Uhl J, Valenzuela B, Vestergaard G, Wörmer L,  
34 Zamorano P. 2018. Transitory microbial habitat in the hyperarid Atacama Desert. *Proc Natl*  
35 *Acad Sci U S A* 115:2670–2675.
- 36 54. Munk P, Andersen VD, de Knecht L, Jensen MS, Knudsen BE, Lukjancenko O, Mordhorst H,  
37 Clasen J, Agersø Y, Folkesson A, Pamp SJ, Vigre H, Aarestrup FM. 2017. A sampling and  
38 metagenomic sequencing-based methodology for monitoring antimicrobial resistance in  
39 swine herds. *J Antimicrob Chemother* 72:385–392.
- 40 55. Huddy RJ, Sachdeva R, Kadzinga F, Kantor R, Harrison STL, Banfield JF. 2020.



- 1 Thiocyanate and organic carbon inputs drive convergent selection for specific autotrophic  
2 *Afipia* and *Thiobacillus* strains within complex microbiomes. Cold Spring Harbor Laboratory.
- 3 56. Kantor RS, van Zyl AW, van Hille RP, Thomas BC, Harrison STL, Banfield JF. 2015.  
4 Bioreactor microbial ecosystems for thiocyanate and cyanide degradation unravelled with  
5 genome-resolved metagenomics. *Environ Microbiol* 17:4929–4941.
- 6 57. Probst AJ, Castelle CJ, Singh A, Brown CT, Anantharaman K, Sharon I, Hug LA, Burstein  
7 D, Emerson JB, Thomas BC, Banfield JF. 2017. Genomic resolution of a cold subsurface  
8 aquifer community provides metabolic insights for novel microbes adapted to high CO<sub>2</sub>  
9 concentrations. *Environ Microbiol* 19:459–474.
- 10 58. Okazaki Y, Nishimura Y, Yoshida T, Ogata H, Nakano S-I. 2019. Genome-resolved viral and  
11 cellular metagenomes revealed potential key virus-host interactions in a deep freshwater  
12 lake. *Environ Microbiol* 21:4740–4754.
- 13 59. Lemos LN, Medeiros JD, Dini-Andreote F, Fernandes GR, Varani AM, Oliveira G, Pylro VS.  
14 2019. Genomic signatures and co-occurrence patterns of the ultra-small *Saccharimonadia*  
15 (phylum CPR/Patescibacteria) suggest a symbiotic lifestyle. *Mol Ecol* 28:4259–4271.
- 16 60. Sharrar AM, Crits-Christoph A, Méheust R, Diamond S, Starr EP, Banfield JF. 2020.  
17 Bacterial Secondary Metabolite Biosynthetic Potential in Soil Varies with Phylum, Depth,  
18 and Vegetation Type. *MBio* 11.
- 19 61. Zeng Y, Chen X, Madsen AM, Zervas A, Nielsen TK, Andrei A-S, Lund-Hansen LC, Liu Y,  
20 Hansen LH. 2020. Potential Rhodopsin- and Bacteriochlorophyll-Based Dual Phototrophy in  
21 a High Arctic Glacier. *MBio* 11.
- 22 62. Alteio LV, Schulz F, Seshadri R, Varghese N, Rodriguez-Reillo W, Ryan E, Goudeau D,  
23 Eichorst SA, Malmstrom RR, Bowers RM, Katz LA, Blanchard JL, Woyke T. 2020.  
24 Complementary Metagenomic Approaches Improve Reconstruction of Microbial Diversity in  
25 a Forest Soil. *mSystems* 5.
- 26 63. Vavourakis CD, Mehrshad M, Balkema C, van Hall R, Andrei A-Ş, Ghai R, Sorokin DY,  
27 Muyzer G. 2019. Metagenomes and metatranscriptomes shed new light on the  
28 microbial-mediated sulfur cycle in a Siberian soda lake. *BMC Biol* 17:69.
- 29 64. Campanaro S, Treu L, Rodriguez-R LM, Kovalovszki A, Ziels RM, Maus I, Zhu X, Kougias  
30 PG, Basile A, Luo G, Schlüter A, Konstantinidis KT, Angelidaki I. 2020. New insights from  
31 the biogas microbiome by comprehensive genome-resolved metagenomics of nearly 1600  
32 species originating from multiple anaerobic digesters. *Biotechnol Biofuels* 13:25.
- 33 65. Vavourakis CD, Andrei A-S, Mehrshad M, Ghai R, Sorokin DY, Muyzer G. 2018. A  
34 metagenomics roadmap to the uncultured genome diversity in hypersaline soda lake  
35 sediments. *Microbiome* 6:168.
- 36 66. Wang W, Hu H, Zijlstra RT, Zheng J, Gänzle MG. 2019. Metagenomic reconstructions of gut  
37 microbial metabolism in weanling pigs. *Microbiome* 7:48.
- 38 67. Tian R, Ning D, He Z, Zhang P, Spencer SJ, Gao S, Shi W, Wu L, Zhang Y, Yang Y, Adams

- 1 BG, Rocha AM, Detienne BL, Lowe KA, Joyner DC, Klingeman DM, Arkin AP, Fields MW,  
2 Hazen TC, Stahl DA, Alm EJ, Zhou J. 2020. Small and mighty: adaptation of superphylum  
3 Patescibacteria to groundwater environment drives their genome simplicity. *Microbiome*  
4 8:51.
- 5 68. Keren R, Lawrence JE, Zhuang W, Jenkins D, Banfield JF, Alvarez-Cohen L, Zhou L, Yu K.  
6 2020. Increased replication of dissimilatory nitrate-reducing bacteria leads to decreased  
7 anammox bioreactor performance. *Microbiome* 8:7.
- 8 69. Cao Y, Xu H, Li R, Gao S, Chen N, Luo J, Jiang Y. 2019. Genetic Basis of Phenotypic  
9 Differences Between Chinese Yunling Black Goats and Nubian Goats Revealed by  
10 Allele-Specific Expression in Their F1 Hybrids. *Front Genet* 10:145.
- 11 70. Finstad KM, Probst AJ, Thomas BC, Andersen GL, Demergasso C, Echeverría A,  
12 Amundson RG, Banfield JF. 2017. Microbial Community Structure and the Persistence of  
13 Cyanobacterial Populations in Salt Crusts of the Hyperarid Atacama Desert from  
14 Genome-Resolved Metagenomics. *Frontiers in Microbiology*.
- 15 71. Kantor RS, Miller SE, Nelson KL. 2019. The Water Microbiome Through a Pilot Scale  
16 Advanced Treatment Facility for Direct Potable Reuse. *Front Microbiol* 10:993.
- 17 72. Beam JP, Becraft ED, Brown JM, Schulz F, Jarett JK, Bezuidt O, Poulton NJ, Clark K,  
18 Dunfield PF, Ravin NV, Spear JR, Hedlund BP, Kormas KA, Sievert SM, Elshahed MS,  
19 Barton HA, Stott MB, Eisen JA, Moser DP, Onstott TC, Woyke T, Stepanauskas R. 2020.  
20 Ancestral Absence of Electron Transport Chains in Patescibacteria and DPANN. *Front*  
21 *Microbiol* 11:1848.
- 22 73. Tung J, Barreiro LB, Burns MB, Grenier J-C, Lynch J, Grieneisen LE, Altmann J, Alberts  
23 SC, Blekhman R, Archie EA. 2015. Social networks predict gut microbiome composition in  
24 wild baboons. *Elife* 4.
- 25 74. Hervé V, Liu P, Dietrich C, Sillam-Dussès D, Stiblik P, Šobotník J, Brune A. 2020.  
26 Phylogenomic analysis of 589 metagenome-assembled genomes encompassing all major  
27 prokaryotic lineages from the gut of higher termites. *PeerJ* 8:e8614.
- 28 75. UQ eSpace.
- 29 76. Espinoza JL, Harkins DM, Torralba M, Gomez A, Highlander SK, Jones MB, Leong P,  
30 Saffery R, Bockmann M, Kuelbs C, Inman JM, Hughes T, Craig JM, Nelson KE, Dupont CL.  
31 2018. Supragingival Plaque Microbiome Ecology and Functional Potential in the Context of  
32 Health and Disease. *MBio* 9.
- 33 77. Stamps BW, Spear JR. 2020. Identification of Metagenome-Assembled Genomes  
34 Containing Antimicrobial Resistance Genes, Isolated from an Advanced Water Treatment  
35 Facility. *Microbiol Resour Announc* 9.
- 36 78. Zhou Z, Liu Y, Xu W, Pan J, Luo Z-H, Li M. 2020. Genome- and Community-Level  
37 Interaction Insights into Carbon Utilization and Element Cycling Functions of  
38 Hydrothermarchaeota in Hydrothermal Sediment. *mSystems* 5.

- 1 79. Mehrshad M, Lopez-Fernandez M, Sundh J, Bell E, Simone D, Buck M, Bernier-Latmani R,  
2 Bertilsson S, Dopson M. 2020. Energy efficiency and biological interactions define the core  
3 microbiome of deep oligotrophic groundwater. Cold Spring Harbor Laboratory.
- 4 80. Ortiz M, Leung PM, Shelley G, Van Goethem MW, Bay SK, Jordaan K, Vikram S, Hogg ID,  
5 Makhalanyane TP, Chown SL, Grinter R, Cowan DA, Greening C. 2020. A genome  
6 compendium reveals diverse metabolic adaptations of Antarctic soil microorganisms. Cold  
7 Spring Harbor Laboratory.
- 8 81. Buck M, Garcia SL, Vidal LF, Martin G, Martinez Rodriguez GA, Saarenheimo J, Zopfi J,  
9 Bertilsson S, Peura S. 2020. Comprehensive dataset of shotgun metagenomes from  
10 stratified freshwater lakes and ponds. Cold Spring Harbor Laboratory.
- 11 82. Shaiber A, Eren AM. 2019. Composite Metagenome-Assembled Genomes Reduce the  
12 Quality of Public Genome Repositories. MBio.
- 13 83. Soro V, Dutton LC, Sprague SV, Nobbs AH, Ireland AJ, Sandy JR, Jepson MA, Micaroni M,  
14 Splatt PR, Dymock D, Jenkinson HF. 2014. Axenic culture of a candidate division TM7  
15 bacterium from the human oral cavity and biofilm interactions with other oral bacteria. Appl  
16 Environ Microbiol 80:6480–6489.
- 17 84. Moreira D, Zivanovic Y, López-Archilla AI, Iniesto M, López-García P. 2020. Reductive  
18 evolution and unique infection and feeding mode in the CPR predatory bacterium  
19 *Vampirococcus lugosii*. Cold Spring Harbor Laboratory.
- 20 85. Yamamoto T, Iino H, Kim K, Kuramitsu S, Fukui K. 2011. Evidence for ATP-dependent  
21 structural rearrangement of nuclease catalytic site in DNA mismatch repair endonuclease  
22 MutL. J Biol Chem 286:42337–42348.
- 23 86. Cardenas JP, Quatrini R, Holmes DS. 2016. Aerobic Lineage of the Oxidative Stress  
24 Response Protein Rubrerythrin Emerged in an Ancient Microaerobic, (Hyper)Thermophilic  
25 Environment. Frontiers in Microbiology.
- 26 87. Rissanen AJ, Saarela T, Jäntti H, Buck M, Peura S, Aalto SL, Ojala A, Pumpanen J, Tiirola  
27 M, Elvert M, Nykänen H. 2020. Vertical stratification patterns of methanotrophs and their  
28 genetic controllers in water columns of oxygen-stratified boreal lakes. FEMS Microbiol Ecol  
29 <https://doi.org/10.1093/femsec/fiaa252>.
- 30 88. Sheridan PO, Raguideau S, Quince C, Holden J, Zhang L, Thames Consortium, Williams  
31 TA, Gubry-Rangin C. 2020. Gene duplication drives genome expansion in a major lineage  
32 of Thaumarchaeota. Nat Commun 11:5494.
- 33 89. Szöllösi GJ, Rosikiewicz W, Boussau B, Tannier E, Daubin V. 2013. Efficient Exploration of  
34 the Space of Reconciled Gene Trees. Syst Biol 62:901–912.
- 35 90. Bor B, McLean JS, Foster KR, Cen L, To TT, Serrato-Guillen A, Dewhurst FE, Shi W, He X.  
36 2018. Rapid evolution of decreased host susceptibility drives a stable relationship between  
37 ultrasmall parasite TM7x and its bacterial host. Proc Natl Acad Sci U S A  
38 115:12277–12282.

- 1 91. Luef B, Frischkorn KR, Wrighton KC, Holman H-YN, Birarda G, Thomas BC, Singh A,  
2 Williams KH, Siegerist CE, Tringe SG, Downing KH, Comolli LR, Banfield JF. 2015. Diverse  
3 uncultivated ultra-small bacterial cells in groundwater. *Nat Commun* 6:6372.
- 4 92. Méheust R, Castelle CJ, Matheus Carnevali PB, Farag IF, He C, Chen L-X, Amano Y, Hug  
5 LA, Banfield JF. 2020. Groundwater Elusimicrobia are metabolically diverse compared to  
6 gut microbiome Elusimicrobia and some have a novel nitrogenase paralog. *ISME J*  
7 14:2907–2922.
- 8 93. McCutcheon JP, Moran NA. 2011. Extreme genome reduction in symbiotic bacteria. *Nat*  
9 *Rev Microbiol* 10:13–26.
- 10 94. Martijn J, Schön ME, Lind AE, Vosseberg J, Williams TA, Spang A, Ettema TJG. 2020.  
11 Hikarchaea demonstrate an intermediate stage in the methanogen-to-halophile transition.  
12 *Nat Commun* 11:5490.
- 13 95. Abby SS, Kerou M, Schleper C. 2020. Ancestral Reconstructions Decipher Major  
14 Adaptations of Ammonia-Oxidizing Archaea upon Radiation into Moderate Terrestrial and  
15 Marine Environments. *MBio* 11.
- 16 96. Chen L-X, Anantharaman K, Shaiber A, Eren AM, Banfield JF. 2020. Accurate and  
17 complete genomes from metagenomes. *Genome Res* 30:315–333.
- 18 97. Parks DH, Imelfort M, Skennerton CT, Hugenholtz P, Tyson GW. 2015. CheckM: assessing  
19 the quality of microbial genomes recovered from isolates, single cells, and metagenomes.  
20 *Genome Res* 25:1043–1055.
- 21 98. Olm MR, Brown CT, Brooks B, Banfield JF. 2017. dRep: a tool for fast and accurate  
22 genomic comparisons that enables improved genome recovery from metagenomes through  
23 de-replication. *ISME J* 11:2864–2868.
- 24 99. Aramaki T, Blanc-Mathieu R, Endo H, Ohkubo K, Kanehisa M, Goto S, Ogata H. 2020.  
25 KofamKOALA: KEGG Ortholog assignment based on profile HMM and adaptive score  
26 threshold. *Bioinformatics* 36:2251–2252.
- 27 100. Criscuolo A, Gribaldo S. 2010. BMGE (Block Mapping and Gathering with Entropy): a  
28 new software for selection of phylogenetic informative regions from multiple sequence  
29 alignments. *BMC Evol Biol* 10:210.
- 30 101. Nguyen L-T, Schmidt HA, von Haeseler A, Minh BQ. 2015. IQ-TREE: a fast and effective  
31 stochastic algorithm for estimating maximum-likelihood phylogenies. *Mol Biol Evol*  
32 32:268–274.
- 33 102. Letunic I, Bork P. 2016. Interactive tree of life (iTOL) v3: an online tool for the display and  
34 annotation of phylogenetic and other trees. *Nucleic Acids Res* 44:W242–5.
- 35 103. Boyd JA, Woodcroft BJ, Tyson GW. 2018. GraftM: a tool for scalable, phylogenetically  
36 informed classification of genes within metagenomes. *Nucleic Acids Res* 46:e59.
- 37 104. Capella-Gutiérrez S, Silla-Martínez JM, Gabaldón T. 2009. trimAl: a tool for automated

- 1 alignment trimming in large-scale phylogenetic analyses. *Bioinformatics* 25:1972–1973.
- 2 105. Pushkarev A, Inoue K, Larom S, Flores-Urbe J, Singh M, Konno M, Tomida S, Ito S,  
3 Nakamura R, Tsunoda SP, Philosof A, Sharon I, Yutin N, Koonin EV, Kandori H, Béjà O.  
4 2018. A distinct abundant group of microbial rhodopsins discovered using functional  
5 metagenomics. *Nature* 558:595–599.
- 6 106. Hasegawa M, Hosaka T, Kojima K, Nishimura Y, Nakajima Y, Kimura-Someya T,  
7 Shirouzu M, Sudo Y, Yoshizawa S. 2020. A unique clade of light-driven proton-pumping  
8 rhodopsins evolved in the cyanobacterial lineage. *Sci Rep* 10:16752.
